# Supplementary material for: Catalytic sulfate formation mechanism influenced by important constituents of cloud waterviathe reaction of SO2oxidized by hypobromic acid in marine areas
Source: Royal Society of Chemistry journal article supplement (doi:10.1039/d1cp01981c), 2021-01-01
Supplement: d1cp01981c1.pdf [file d1cp01981c1.pdf]

**Supplementary Materials for**

**Catalytic sulfate formation mechanism influenced by important**

**constituents of cloud water via the reaction of SO<sub>2</sub> oxidized by**

**hypobromic acid in marine areas**

Jiarong Liu <sup>a</sup>, Danli Liang <sup>a</sup>, Ling Liu <sup>a</sup>, An Ning <sup>a</sup>, and Xiuhui Zhang <sup>a\*</sup>

<sup>a</sup> Key Laboratory of Cluster Science, Ministry of Education of China, School of Chemistry and Chemical Engineering, Beijing Institute of Technology, Beijing 100081, China.

\* Corresponding author, E-mail address: [zhangxiuhui@bit.edu.cn](mailto:zhangxiuhui@bit.edu.cn).

**Contents**

|                                                                                                                                                                                                        |    |
|--------------------------------------------------------------------------------------------------------------------------------------------------------------------------------------------------------|----|
| Section 1. Theoretical method .....                                                                                                                                                                    | 3  |
| 1.1 Aqueous concentration of S(IV) .....                                                                                                                                                               | 3  |
| 1.2 Aqueous concentration of hypobromic acid .....                                                                                                                                                     | 3  |
| Section 2. Figures .....                                                                                                                                                                               | 5  |
| Section 3. Results.....                                                                                                                                                                                | 13 |
| 3.1 The reaction rates between HOBr and HOSO <sub>2</sub> <sup>-</sup> leading to sulfate formation. 13                                                                                                |    |
| 3.1.1 The reaction rate via Pathway 1(HOBr + HOSO <sub>2</sub> <sup>-</sup> ) .....                                                                                                                    | 13 |
| 3.1.2 The reaction rate via Pathway 2(HOBr + HOSO <sub>2</sub> <sup>-</sup> ) .....                                                                                                                    | 15 |
| 3.1.3 S(IV) oxidation rates, related reaction rate constants and S(IV) lifetimes through Pathway 1(HOBr + HOSO <sub>2</sub> <sup>-</sup> ) and Pathway 2(HOBr + HOSO <sub>2</sub> <sup>-</sup> ) ..... | 17 |
| 3.2 The reaction rates between HOBr and SO <sub>3</sub> <sup>2-</sup> leading to sulfate formation .....                                                                                               | 19 |
| 3.2.1 The reaction rate via Pathway 1(HOBr + SO <sub>3</sub> <sup>2-</sup> ) .....                                                                                                                     | 19 |
| 3.2.2 The reaction rate via Pathway 2(HOBr + SO <sub>3</sub> <sup>2-</sup> ) .....                                                                                                                     | 23 |
| 3.2.3 S(IV) oxidation rates, related reaction rate constants and S(IV) lifetimes through Pathway 1(HOBr + SO <sub>3</sub> <sup>2-</sup> ) and Pathway 2(HOBr + SO <sub>3</sub> <sup>2-</sup> ) .....   | 24 |
| 3.3 The reaction rates between OBr <sup>-</sup> and SO <sub>3</sub> <sup>2-</sup> leading to sulfate formation .....                                                                                   | 27 |

|                                                                                                                                                                                                                                |           |
|--------------------------------------------------------------------------------------------------------------------------------------------------------------------------------------------------------------------------------|-----------|
| 3.3.1 The reaction rate via Pathway 1(OBr <sup>-</sup> and SO <sub>3</sub> <sup>2-</sup> ).....                                                                                                                                | 27        |
| 3.3.2 The reaction rate via Pathway 2(OBr <sup>-</sup> and SO <sub>3</sub> <sup>2-</sup> ).....                                                                                                                                | 32        |
| 3.3.3 S(IV) oxidation rates, related reaction rate constants and S(IV) lifetimes<br>through Pathway 1(OBr <sup>-</sup> + SO <sub>3</sub> <sup>2-</sup> ) and Pathway 2(OBr <sup>-</sup> + SO <sub>3</sub> <sup>2-</sup> )..... | 34        |
| <b>Section 4. Cartesian coordinates of the structures.....</b>                                                                                                                                                                 | <b>36</b> |
| 4.1 Cartesian coordinates of the structures involving in the reaction of HOBr with<br>HOSO <sub>2</sub> <sup>-</sup> .....                                                                                                     | 36        |
| 4.2 Cartesian coordinates of the structures involving in the reaction of HOBr with<br>SO <sub>3</sub> <sup>2-</sup> .....                                                                                                      | 42        |
| 4.3 Cartesian coordinates of the structures involving in the reaction of OBr <sup>-</sup> with<br>SO <sub>3</sub> <sup>2-</sup> .....                                                                                          | 46        |

## Section 1. Theoretical method

### 1.1 Aqueous concentration of S(IV)

For reactant S(IV), the ratio of the distribution of different forms ( $\text{HOSO}_2^-$ ,  $\text{SO}_3^{2-}$ ) is important for identifying the possible oxidation reaction, and thus should be calculated. The corresponding computational methods about the ratio of the distribution of different forms ( $\text{HOSO}_2^-$ ,  $\text{SO}_3^{2-}$ ) has been discussed in our previous work.<sup>1</sup>

### 1.2 Aqueous concentration of hypobromic acid

For the reactant HOBr, the aqueous [HOBr] can also estimate based on the gas-phase mixing ratio using Henry's law

$$[\text{HOBr}] = p(\text{HOBr}) \times H(\text{HOBr}) \quad (1)$$

where  $p(\text{HOBr})$  is the partial pressure of HOBr in the gas phase and  $H(\text{HOBr})$  is the Henry's constant which has been measured from laboratory experiment and reported to be about  $1900 \text{ M}^1 \text{atm}^{-1}$ .<sup>2</sup>

Moreover, according to measurement results, the gas phase ground-level mixing ratio HOBr varies between about 0.01 ppbv and 0.310 ppbv. The corresponding partial pressures  $p(\text{HOBr})$  are  $1.00 \times 10^{-11} \text{ atm}$ - $3.10 \times 10^{-10} \text{ atm}$

$$[\text{HOBr}] = 1.00 \times 10^{-11} \text{ atm} \times 1900 \text{ M}^1 \text{atm}^{-1} = 1.90 \times 10^{-8} \text{ M} \quad (2)$$

$$[\text{HOBr}] = 3.10 \times 10^{-10} \text{ atm} \times 1900 \text{ M}^1 \text{atm}^{-1} = 5.89 \times 10^{-7} \text{ M} \quad (3)$$

we thus obtain a range of  $1.90 \times 10^{-8}$ - $5.89 \times 10^{-7} \text{ M}$  for [HOBr]. The concentration of  $\text{OBr}^-$  anion can be obtained from the equilibrium expression:

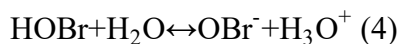

$$\frac{[\text{HOBr}]}{[\text{OBr}^-]} = \frac{[\text{H}_3\text{O}^+]}{K_{a3}} \quad (5)$$

$$[\text{OBr}^-] = K_{a3} \times [\text{HOBr}] / [\text{H}_3\text{O}^+] \quad (6)$$

where  $K_{a3}$  ( $10^{-8.9}$ ) is the acidity constant for HOBr. Concentrations of  $\text{OBr}^-$  corresponding to the [HOBr] range given above at different pH are shown in Table S2.

The distributions fraction of the two anions can be computed as:

$$\delta_{\text{HOBr}} = [\text{HOBr}] / ([\text{HOBr}] + [\text{OBr}^-]) \quad (7)$$

$$= [\text{HOBr}]/([\text{HOBr}] + K_{a3} \times [\text{HOBr}]/[\text{H}_3\text{O}^+]) \quad (8)$$

$$= 1/(1 + K_{a3}/[\text{H}_3\text{O}^+]) = [\text{H}_3\text{O}^+]/([\text{H}_3\text{O}^+] + K_{a3}) \quad (9)$$

$$\delta_{\text{OBr}^-} = [\text{OBr}^-]/([\text{HOBr}] + [\text{OBr}^-]) \quad (10)$$

$$= [\text{OBr}^-]/([\text{OBr}^-] + [\text{H}_3\text{O}^+] \times [\text{OBr}^-]/K_{a3}) \quad (11)$$

$$= 1/(1 + [\text{H}_3\text{O}^+]/K_{a3}) = K_{a3}/([\text{H}_3\text{O}^+] + K_{a3}) \quad (12)$$

Table S1. Calculated aqueous  $[\text{OBr}^-]$  under the different aqueous  $[\text{HOBr}]$  ( $[\text{HOBr}] = 1.90 \times 10^{-8} \text{ M}$  and  $[\text{HOBr}] = 5.89 \times 10^{-7} \text{ M}$ ) and pH.

| pH   | $[\text{OBr}^-]$       | $[\text{OBr}^-]$       |
|------|------------------------|------------------------|
| 3    | $2.39 \times 10^{-14}$ | $7.42 \times 10^{-13}$ |
| 4    | $2.39 \times 10^{-13}$ | $7.42 \times 10^{-12}$ |
| 5    | $2.39 \times 10^{-12}$ | $7.42 \times 10^{-11}$ |
| 6    | $2.39 \times 10^{-11}$ | $7.42 \times 10^{-10}$ |
| 6.97 | $2.23 \times 10^{-10}$ | $6.92 \times 10^{-9}$  |
| 7    | $2.39 \times 10^{-10}$ | $7.42 \times 10^{-9}$  |
| 7.5  | $2.39 \times 10^{-9}$  | $7.42 \times 10^{-8}$  |
| 8    | $1.90 \times 10^{-8}$  | $5.89 \times 10^{-7}$  |
| 9    | $2.39 \times 10^{-8}$  | $7.42 \times 10^{-7}$  |

## Section 2. Figures

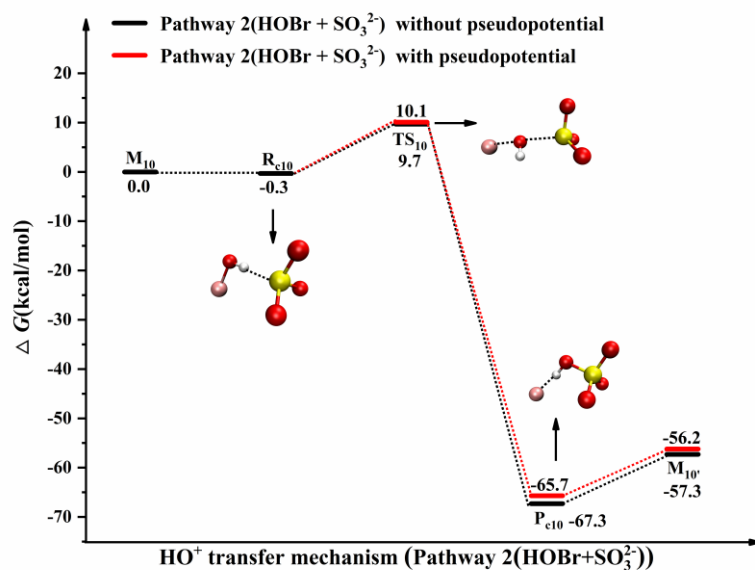

**Fig. S1** The Gibbs free energy profile (kcal/mol, at 298.15 K and a reference concentration of 1 mol/L) for the reaction of HOBr with SO<sub>3</sub><sup>2-</sup> through Pathway 2(HOBr + SO<sub>3</sub><sup>2-</sup>) at the DLPNO-CCSD(T)/aug-cc-pVTZ//M06-2X/6-311++G (3df, 3pd) level of theory with or without pseudopotential. Solvent corrections are included in the M06-2X calculations using the SMD model. The white, pink, red, and yellow spheres represent H, Br, O, and S atoms, respectively.

In order to investigate the effect of pseudopotential on the reactions studied in the present work, we calculated the energy barrier of Pathway 2 between HOBr and SO<sub>3</sub><sup>2-</sup>, the most competitive mechanism in the studied system, with and without pseudopotential. As shown in Fig. S1, the reaction energy barrier with pseudopotential at the M06-2X/6-311++G(3df,3pd)//DLPNO-CCSD(T)/aug-cc-pVTZ (aug-cc-pVTZ-PP for the optimization of Br) level of theory is 10.4 kcal/mol, and that without pseudopotential at the M06-2X/6-311++G(3df,3pd)//DLPNO-CCSD(T)/aug-cc-pVTZ level of theory is 10.0 kcal/mol, with a low deviation of 0.4 kcal/mol. It is suggested that the effect of ignoring pseudopotential on the reaction energy barrier is very unobvious.

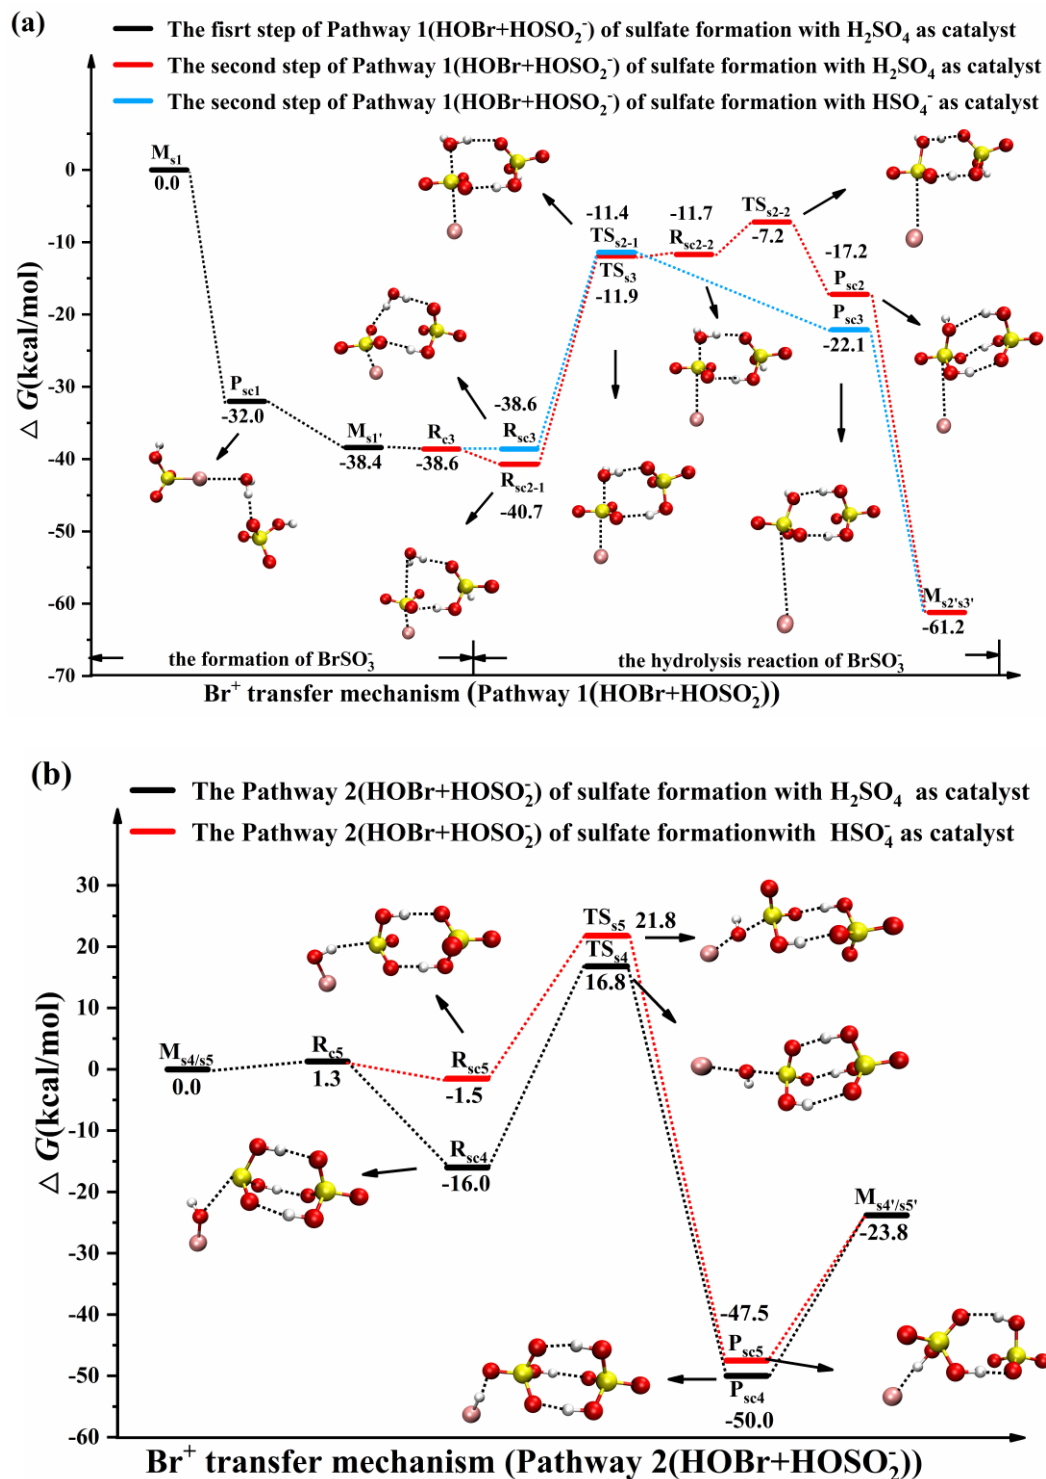

**Fig. S2** The Gibbs free energy profile (kcal/mol, at 298.15 K and a reference concentration of 1 mol/L) for the reaction of HOBr with HOSO<sub>2</sub><sup>-</sup> through (a) Pathway 1(HOBr + HOSO<sub>2</sub><sup>-</sup>) and (b) Pathway 2(HOBr + HOSO<sub>2</sub><sup>-</sup>) at the DLPNO-CCSD(T)/aug-cc-pVTZ//M06-2X/6-311++G (3df, 3pd) level of theory. Solvent corrections are included in the M06-2X calculations using the SMD model. The white, pink, red, and yellow spheres represent H, Br, O, and S atoms, respectively.

(a) — The second step of Pathway 1( $\text{HOBr} + \text{SO}_3^{2-}$ ) of sulfate formation with  $\text{HSO}_4^-$  as catalyst

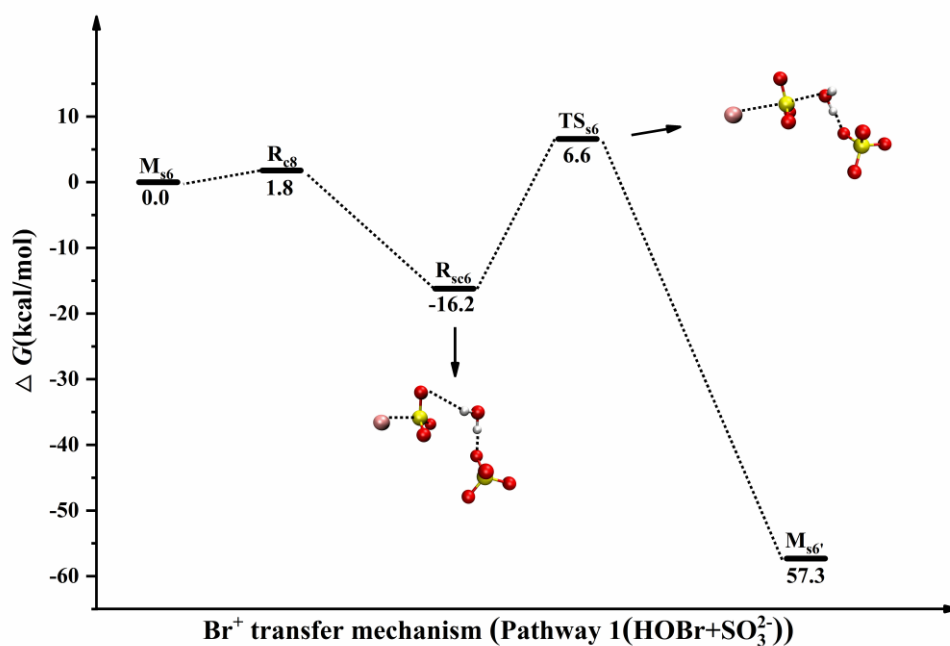

(b) — The Pathway 2( $\text{HOBr} + \text{SO}_3^{2-}$ ) of sulfate formation with  $\text{HSO}_4^-$  as catalyst

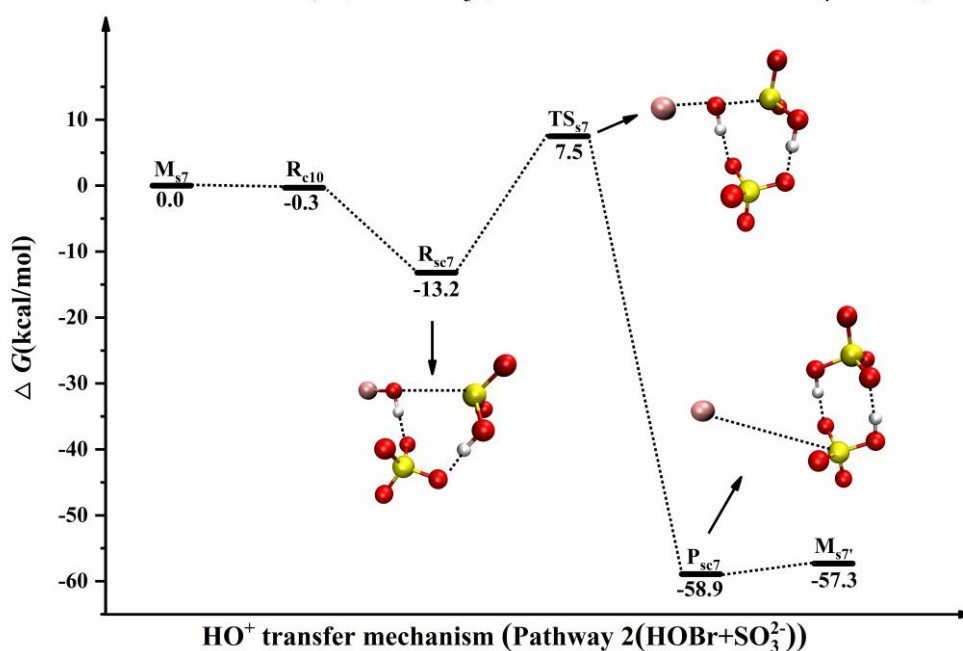

**Fig. S3** The Gibbs free energy profile (kcal/mol, at 298.15 K and a reference concentration of 1 mol/L) for the reaction of HOBr with  $\text{SO}_3^{2-}$  through (a) Pathway 1( $\text{HOBr} + \text{SO}_3^{2-}$ ) and (b) Pathway 2( $\text{HOBr} + \text{SO}_3^{2-}$ ) at the DLPNO-CCSD(T)/aug-cc-pVTZ//M06-2X/6-311++G (3df, 3pd) level of theory. Solvent corrections are included in the M06-2X calculations using the SMD model. The white, pink, red, and yellow spheres represent H, Br, O, and S atoms, respectively.

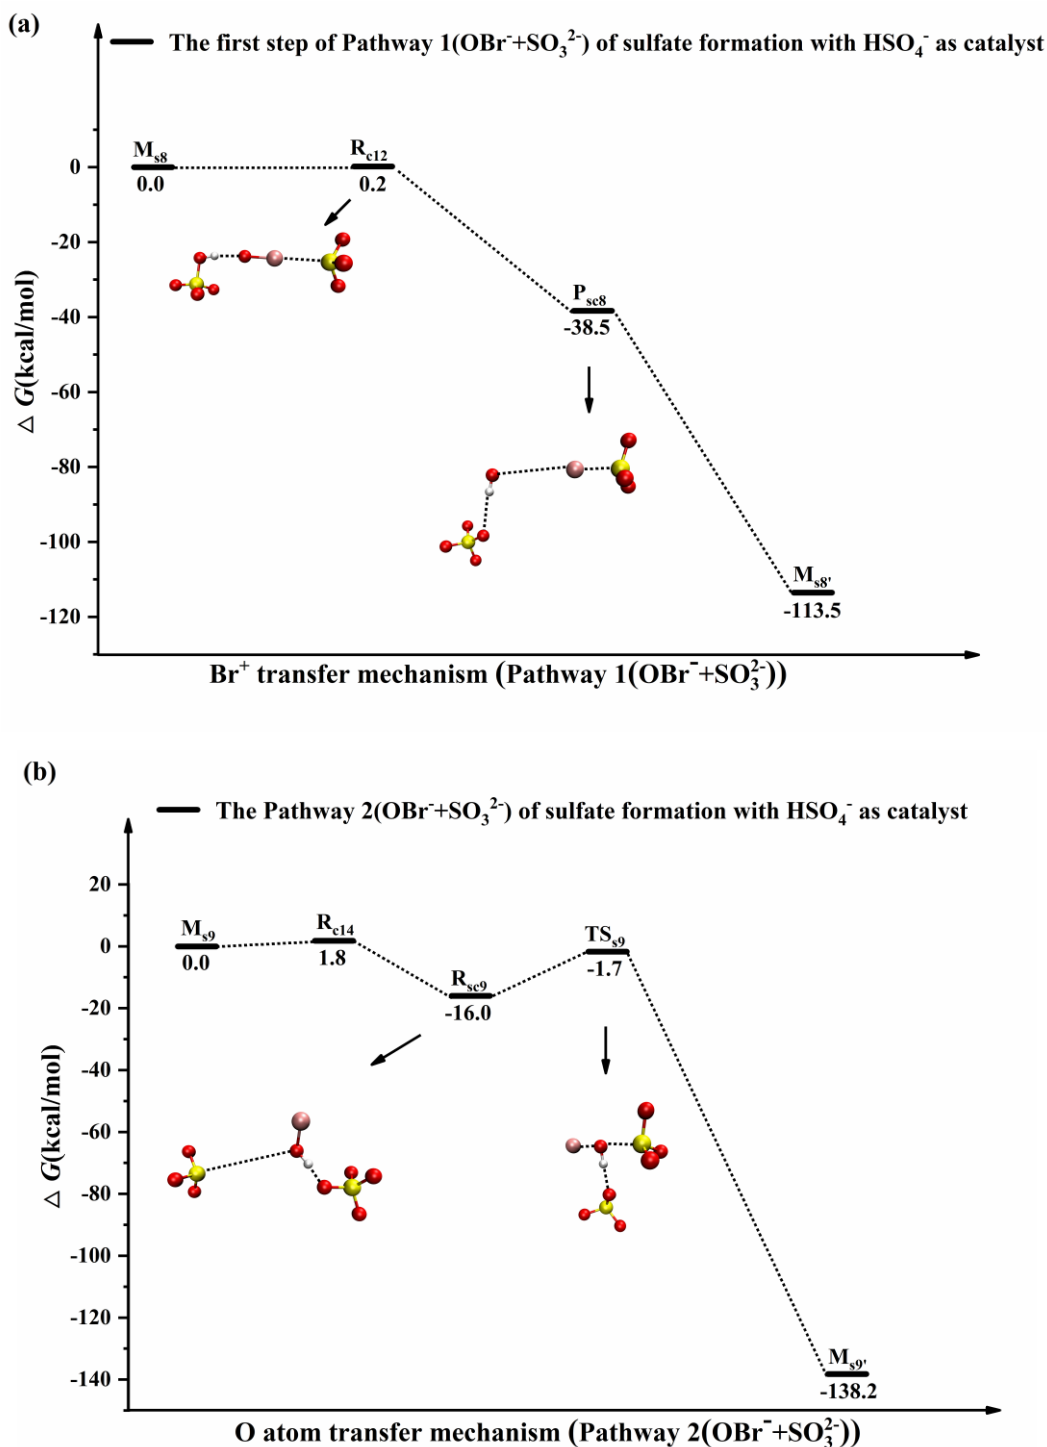

**Fig. S4** The Gibbs free energy profile (kcal/mol, at 298.15 K and a reference concentration of 1 mol/L) for the reaction of  $\text{OBr}^-$  with  $\text{SO}_3^{2-}$  through (a) Pathway 1( $\text{OBr}^- + \text{SO}_3^{2-}$ ) and (b) Pathway 2( $\text{OBr}^- + \text{SO}_3^{2-}$ ) at the DLPNO-CCSD(T)/aug-cc-pVTZ//M06-2X/6-311++G (3df, 3pd) level of theory. Solvent corrections are included in the M06-2X calculations using the SMD model. The white, pink, red, and yellow spheres represent H, Br, O, and S atoms, respectively.



(a)

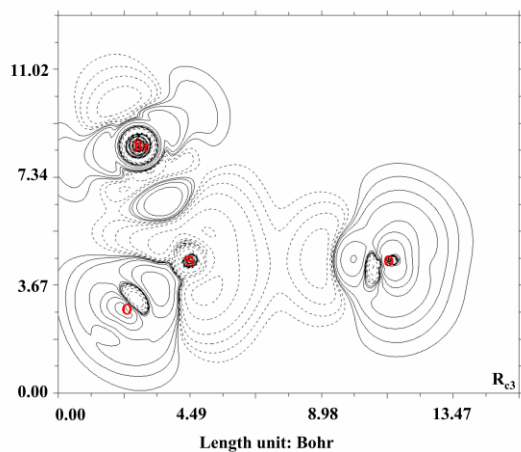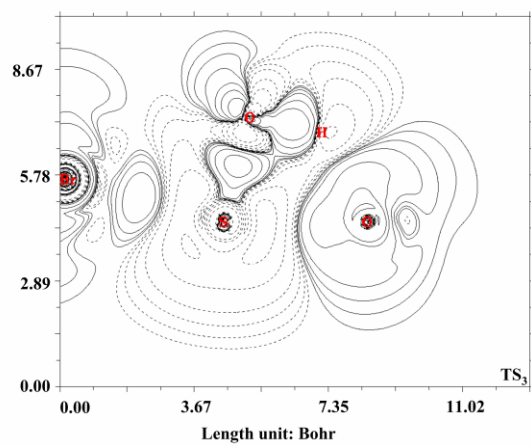

(b)

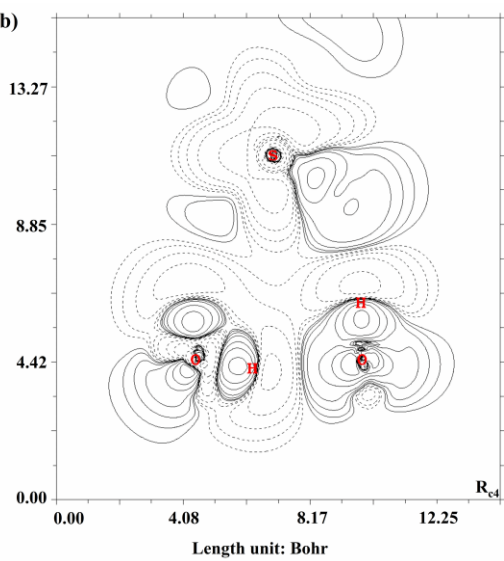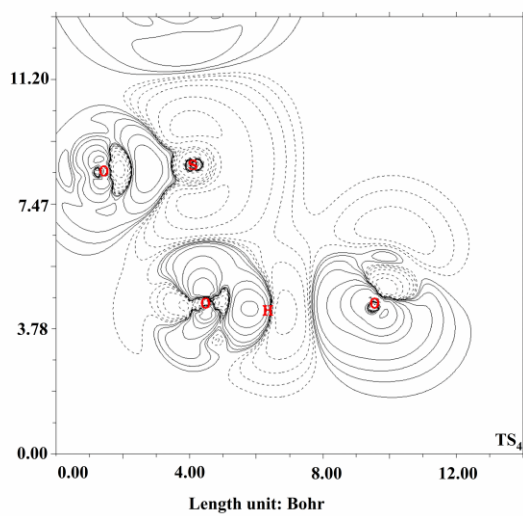

(c)

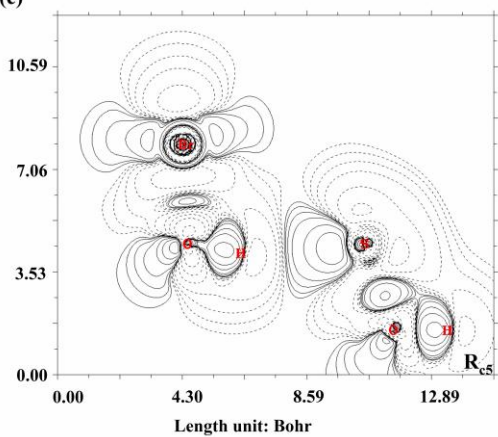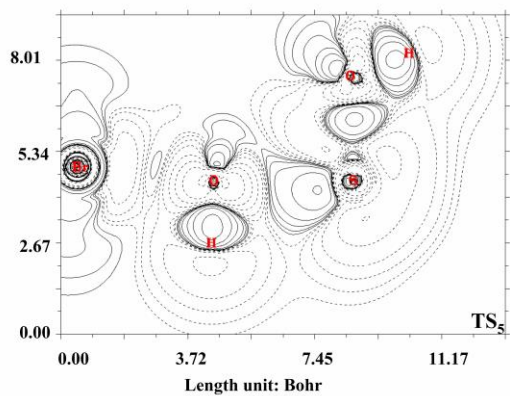

(d)

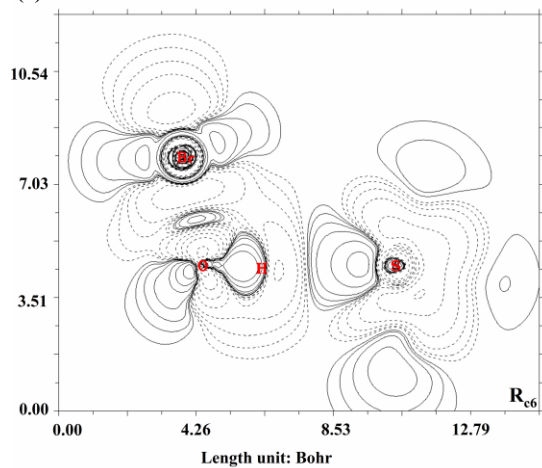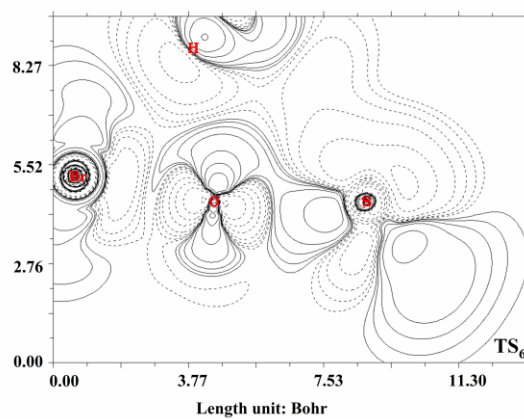

(e)

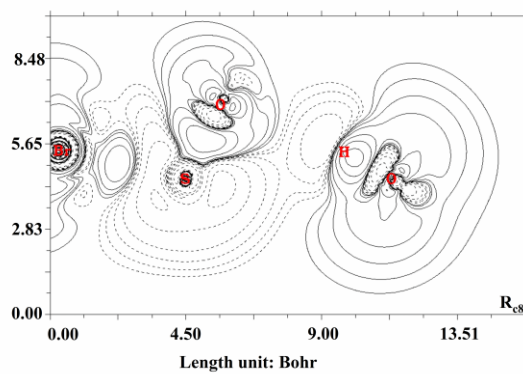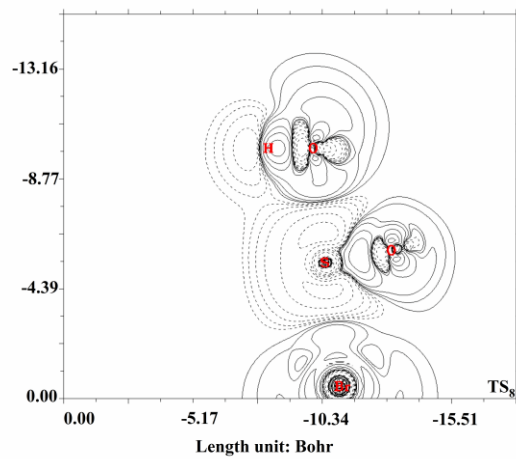

(f)

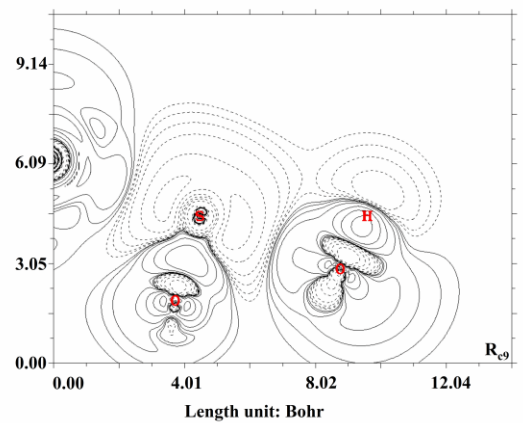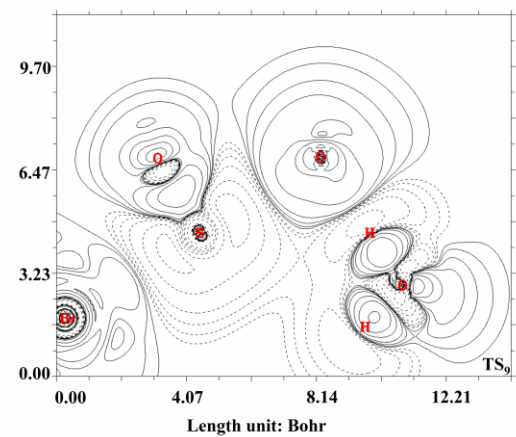

(g)

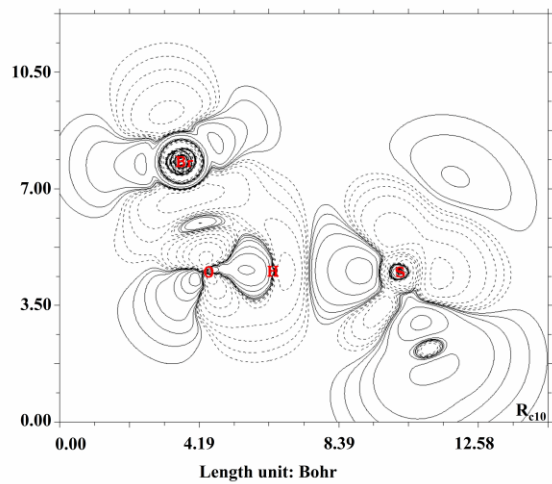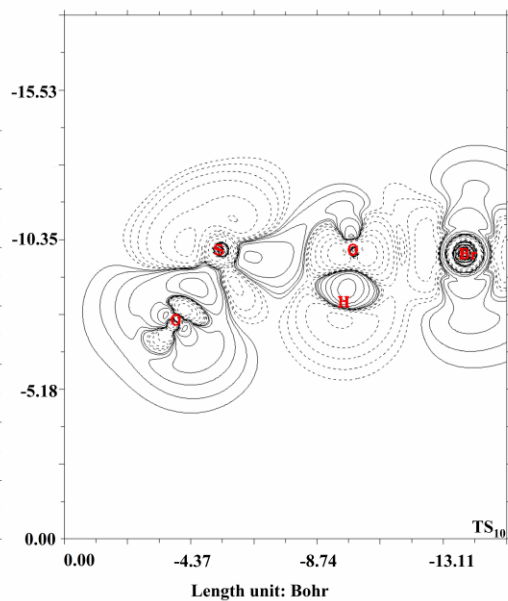

(h)

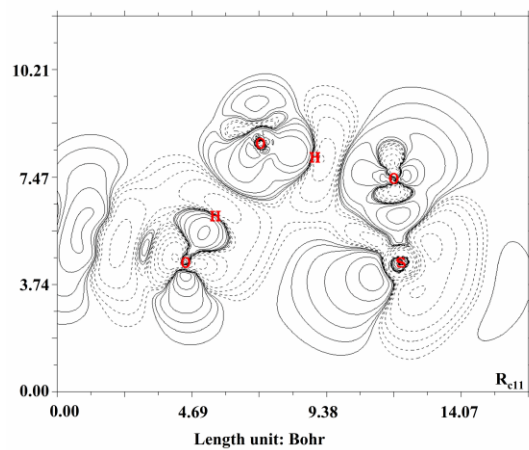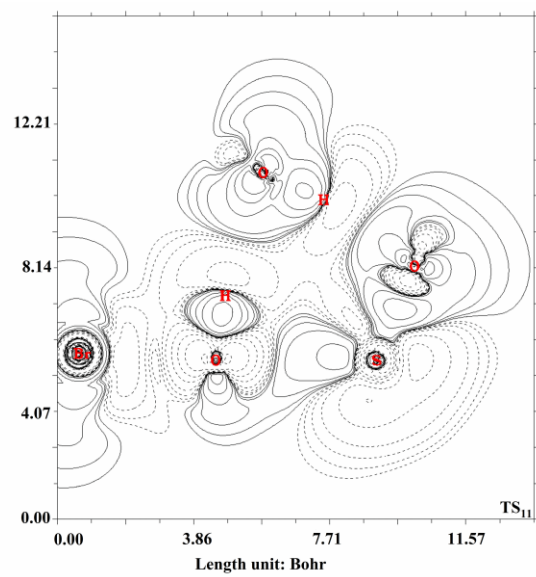

(i)

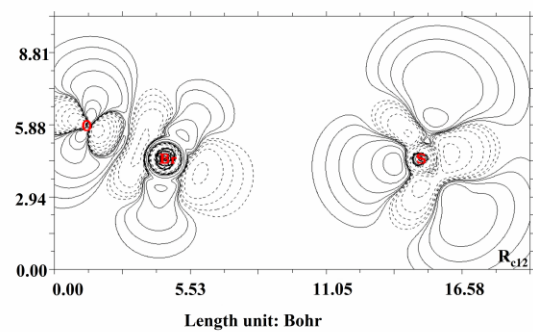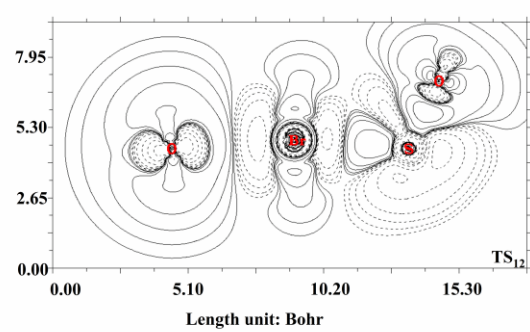

(j)

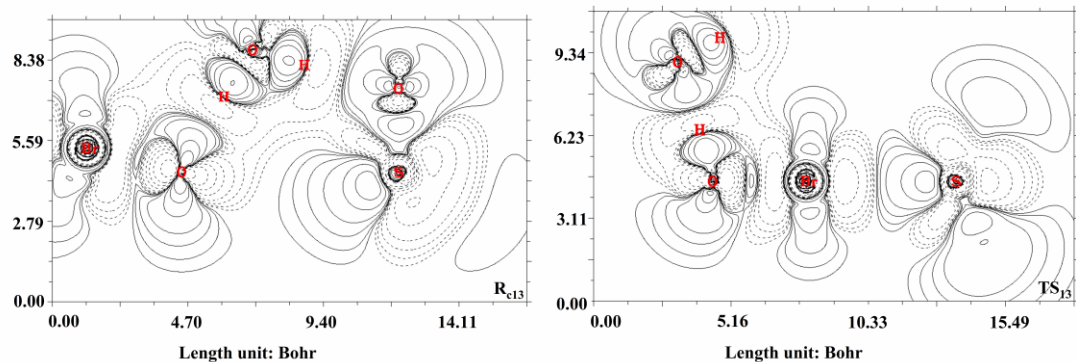

(k)

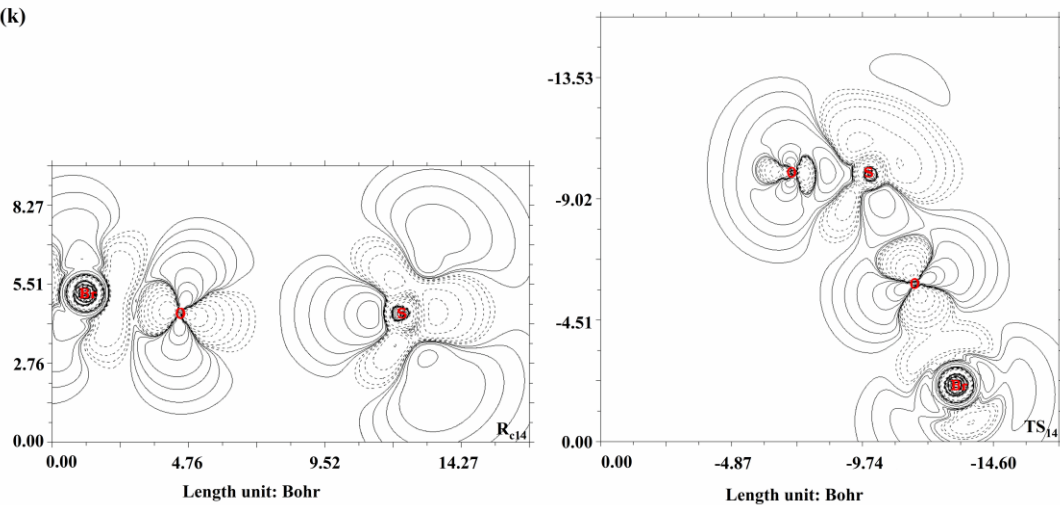

(l)

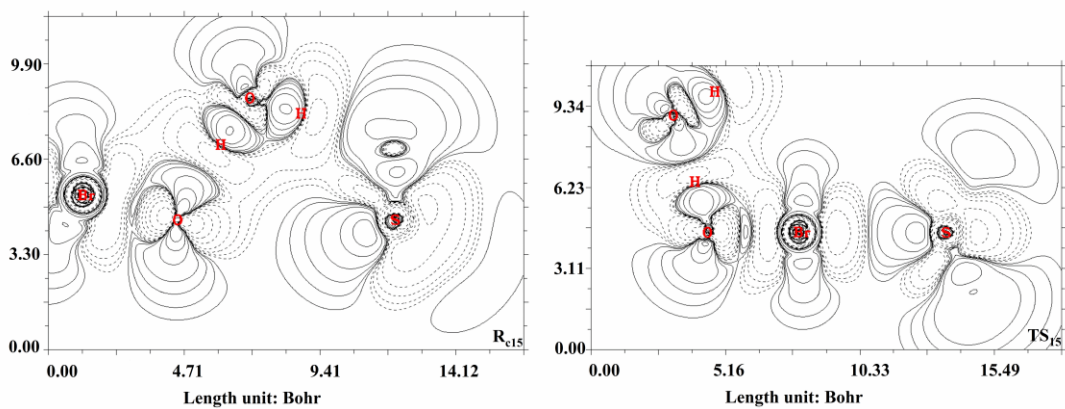

**Fig. S5.** Contour maps of the electron density differences between (a)  $R_{c3}$  and  $TS_3$ , (b)  $R_{c4}$  and  $TS_4$ , (c)  $R_{c5}$  and  $TS_5$  (d)  $R_{c6}$  and  $TS_6$ , (e)  $R_{c8}$  and  $TS_8$ , (f)  $R_{c9}$  and  $TS_9$ , (g)  $R_{c10}$  and  $TS_{10}$ , (h)  $R_{c11}$  and  $TS_{11}$ , (i)  $R_{c12}$  and  $TS_{12}$ , (j)  $R_{c13}$  and  $TS_{13}$ , (k)  $R_{c14}$  and  $TS_{14}$ , (l)  $R_{c15}$  and  $TS_{15}$ . Solid and dashed lines represent areas where electron density increases and decreases, respectively.

## Section 3. Results

### 3.1 The reaction rates between HOBr and HOSO<sub>2</sub><sup>-</sup> leading to sulfate formation

#### 3.1.1 The reaction rate via Pathway 1(HOBr + HOSO<sub>2</sub><sup>-</sup>)

The detailed formation process of sulfate from HOBr and HOSO<sub>2</sub><sup>-</sup> through Pathway 1(HOBr + HOSO<sub>2</sub><sup>-</sup>) is described by the following reaction equations:

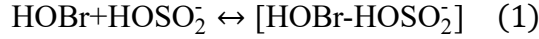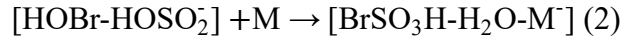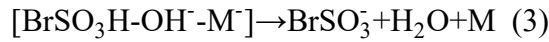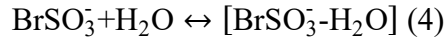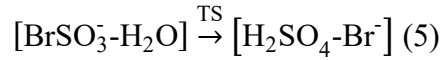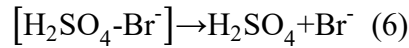

Applying the steady-state approximation to the pre-reactive complex, and assuming that the complex is in equilibrium with the reactant, we obtain the following expressions for the uncatalyzed formation reaction rate ( $v_{1\text{HOBr} + \text{HOSO}_2^-, \text{un}}$ ) of sulfate (where  $k_n$  is the rate constant for reaction n in the scheme given above):

$$v_{1\text{HOBr} + \text{HOSO}_2^-, \text{un}} = \frac{d[\text{SO}_4^{2-}]}{dt} = k_5 [\text{BrSO}_3^- \text{-H}_2\text{O}] \quad (7)$$

$$k_4 [\text{BrSO}_3^-] [\text{H}_2\text{O}] - k_{-4} [\text{BrSO}_3^- \text{-H}_2\text{O}] - k_5 [\text{BrSO}_3^- \text{-H}_2\text{O}] = 0$$

$$[\text{BrSO}_3^- \text{-H}_2\text{O}] = \frac{k_4 [\text{BrSO}_3^-] [\text{H}_2\text{O}]}{k_{-4} + k_5} \quad (7-1)$$

$$k_3 [\text{BrSO}_3\text{H-OH}^- \text{-M}^-] - k_4 [\text{BrSO}_3^-] [\text{H}_2\text{O}] = 0$$

$$[\text{BrSO}_3^-] = \frac{k_3 [\text{BrSO}_3\text{H-OH}^- \text{-M}^-]}{k_4 [\text{H}_2\text{O}]} \quad (7-2)$$

$$k_2 [\text{HOBr-HOSO}_2^-] [\text{M}] - k_3 [\text{BrSO}_3\text{H-OH}^- \text{-M}^-] = 0$$

$$[\text{BrSO}_3\text{H-OH}^- \text{-M}^-] = \frac{k_2 [\text{HOBr-HOSO}_2^-] [\text{M}]}{k_3} \quad (7-3)$$

$$k_1 [\text{HOBr}] [\text{HOSO}_2^-] - k_{-1} [\text{HOBr-HOSO}_2^-] - k_2 [\text{HOBr-HOSO}_2^-] [\text{M}] = 0$$

$$[\text{HOBr-HOSO}_2^-] = \frac{k_1 [\text{HOBr}] [\text{HOSO}_2^-]}{k_{-1} + k_2 [\text{M}]} \quad (7-4)$$

$$v_{1\text{HOBr} + \text{HOSO}_2^-, \text{un}} = \frac{d[\text{SO}_4^{2-}]}{dt} = \frac{k_5}{k_{-4} + k_5} \times \frac{k_1 \times k_2}{k_{-1} + k_2 [\text{M}]} \times [\text{HOBr}] [\text{HOSO}_2^-] [\text{M}] \quad (7-5)$$

The pseudo-unimolecular uncatalyzed S(IV) oxidation rates through Pathway 1(HOBr + HOSO<sub>2</sub><sup>-</sup>) can then be written as

$$v_{1\text{HOBr}+\text{HOSO}_2^{\text{un-S(IV)}}} = \frac{k_5}{k_{-4} + k_5} \times \frac{k_1 \times k_2}{k_{-1} + k_2[\text{M}]} \times [\text{HOBr}][\text{M}] \quad (7-6)$$

where  $k_1/k_{-1}$  are the forward/reverse rate coefficients for the reaction 1,  $k_{-4}$  is the reverse rate coefficient for the reaction 4,  $k_2$  is the diffusion rate constant for the reaction 2, and  $k_5$  is the unimolecular rate constants for the uncatalyzed reaction 5. [M] is the concentration of catalyst M.

The catalyzed formation process of sulfate from HOBr and HOSO<sub>2</sub><sup>-</sup> through Pathway 1(HOBr + HOSO<sub>2</sub><sup>-</sup>) is similarly described by the following reaction equations:

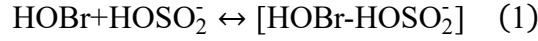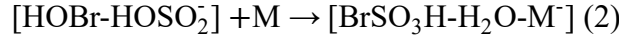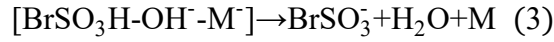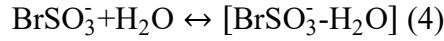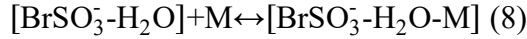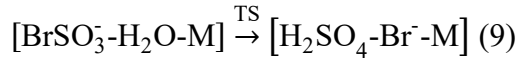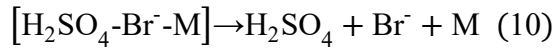

Applying the steady-state approximation to the pre-reactive complex and assuming that the complex is in equilibrium with the reactant, we obtain the following expressions for the catalyzed formation reaction rate ( $v_{1\text{HOBr}+\text{HOSO}_2^{\text{cat}}}$ ) of sulfate (where  $k_n$  is the rate constant for reaction n in the scheme given above):

$$v_{1\text{HOBr}+\text{HOSO}_2^{\text{cat}}} = \frac{d[\text{SO}_4^{2-}]}{dt} = k_9[\text{BrSO}_3^- \text{-H}_2\text{O-M}] \quad (10)$$

$$k_8[\text{BrSO}_3^- \text{-H}_2\text{O}][\text{M}] - k_{-8}[\text{BrSO}_3^- \text{-H}_2\text{O-M}] - k_9[\text{BrSO}_3^- \text{-H}_2\text{O-M}] = 0$$

$$[\text{BrSO}_3^- \text{-H}_2\text{O-M}] = \frac{k_8[\text{BrSO}_3^- \text{-H}_2\text{O}][\text{M}]}{k_{-8} + k_9} \quad (11-1)$$

$$k_4[\text{BrSO}_3^-][\text{H}_2\text{O}] - k_{-4}[\text{BrSO}_3^- \text{-H}_2\text{O}] - k_8[\text{BrSO}_3^- \text{-H}_2\text{O}][\text{M}] = 0$$

$$[\text{BrSO}_3^- \text{-H}_2\text{O}] = \frac{k_4[\text{BrSO}_3^-][\text{H}_2\text{O}]}{k_{-4} + k_8[\text{M}]} \quad (11-2)$$

$$k_3[\text{BrSO}_3\text{H-OH}^- \text{-M}^-] - k_4[\text{BrSO}_3^-][\text{H}_2\text{O}] = 0$$

$$[\text{BrSO}_3^-] = \frac{k_3[\text{BrSO}_3\text{H-OH}^- \text{-M}^-]}{k_4[\text{H}_2\text{O}]} \quad (11-3)$$

$$k_2[\text{HOBr-HOSO}_2^-][\text{M}] - k_3[\text{BrSO}_3\text{H-OH}^- \cdot \text{M}^-] = 0$$

$$[\text{BrSO}_3\text{H-OH}^- \cdot \text{M}^-] = \frac{k_2[\text{HOBr-HOSO}_2^-][\text{M}]}{k_3} \quad (11-4)$$

$$k_1[\text{HOBr}][\text{HOSO}_2^-] - k_{-1}[\text{HOBr-HOSO}_2^-] - k_2[\text{HOBr-HOSO}_2^-][\text{M}] = 0$$

$$[\text{HOBr-HOSO}_2^-] = \frac{k_1[\text{HOBr}][\text{HOSO}_2^-]}{k_{-1} + k_2[\text{M}]} \quad (11-5)$$

$$v_{1\text{HOBr+HOSO}_2^-, \text{cat}} = \frac{d[\text{SO}_4^{2-}]}{dt}$$

$$= \frac{k_9 \times k_8}{k_{-8} + k_9} \times \frac{1}{k_{-4} + k_8[\text{M}]} \times \frac{k_1 \times k_2}{k_{-1} + k_2[\text{M}]} [\text{HOBr}][\text{HOSO}_2^-][\text{M}][\text{M}] \quad (11-6)$$

The pseudo-unimolecular uncatalyzed S(IV) oxidation rates through Pathway 1 (HOBr + HOSO<sub>2</sub><sup>-</sup>) can then be written as

$$v_{1\text{HOBr+HOSO}_2^-, \text{un-S(IV)}} = \frac{k_9 \times k_8}{k_{-8} + k_9} \times \frac{1}{k_{-4} + k_8[\text{M}]} \times \frac{k_1 \times k_2}{k_{-1} + k_2[\text{M}]} [\text{HOBr}][\text{M}][\text{M}] \quad (11-7)$$

where  $k_8/k_{-8}$  symbolize the forward/reverse rate coefficients for the reaction 8 and  $k_9$  is the unimolecular rate constant for the catalyzed reaction 9. [M] is the concentration of catalysts M.

### 3.1.2 The reaction rate via Pathway 2 (HOBr + HOSO<sub>2</sub><sup>-</sup>)

The detailed formation process of sulfate from HOBr and HOSO<sub>2</sub><sup>-</sup> through Pathway 2 (HOBr + HOSO<sub>2</sub><sup>-</sup>) is described by the following reaction equations:

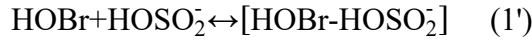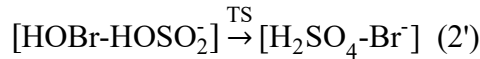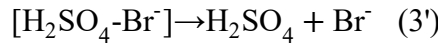

Applying the steady-state approximation to the pre-reactive complex and assuming that the complex is in equilibrium with the reactant, we obtain the following expressions for the uncatalyzed formation reaction rate ( $v_{2\text{HOBr} + \text{HOSO}_2^-, \text{un}}$ ) of sulfate (where  $k_n$  is the rate constant for reaction n in the scheme given above):

$$v_{2\text{HOBr+HOSO}_2^-, \text{un}} = \frac{d[\text{SO}_4^{2-}]}{dt} = k_{2'}[\text{HOBr-HOSO}_2^-] \quad (4')$$

$$k_{1'}[\text{HOBr}][\text{HOSO}_2^-] - k_{-1'}[\text{HOBr-HOSO}_2^-] - k_{2'}[\text{HOBr-HOSO}_2^-] = 0$$

$$[\text{HOBr-HOSO}_2^-] = \frac{k_{1'}}{k_{-1'} + k_{2'}} [\text{HOBr}][\text{HOSO}_2^-] \quad (4'-1)$$

$$v_{2\text{HOBr+HOSO}_2^-, \text{un}} = \frac{d[\text{SO}_4^{2-}]}{dt} = \frac{k_{1'} \times k_{2'}}{k_{-1'} + k_{2'}} [\text{HOBr}][\text{HOSO}_2^-] \quad (4'-2)$$

The pseudo-unimolecular uncatalyzed S(IV) oxidation rate through Pathway 2(HOBr + HOSO<sub>2</sub><sup>-</sup>) can be written as

$$v_{2\text{HOBr}+\text{HOSO}_2^{\text{un-S(IV)}}} = \frac{k_{1'} \times k_{2'}}{k_{-1'} + k_{2'}} [\text{HOBr}] \quad (4'-3)$$

where  $k_{1'}/k_{-1'}$  symbolize the forward/reverse rate coefficients for the reaction 1' and  $k_{2'}$  is the unimolecular rate constant for the uncatalyzed reaction 2'.

The catalyzed formation process of sulfate from HOBr and HOSO<sub>2</sub><sup>-</sup> through Pathway 2(HOBr + HOSO<sub>2</sub><sup>-</sup>) is described by the following reaction equations:

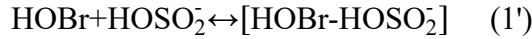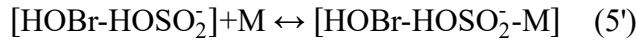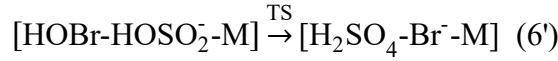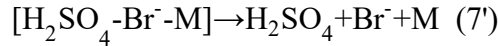

Applying the steady-state approximation to the pre-reactive complex and assuming that the complex is in equilibrium with the reactant, we obtain the following expressions for the catalyzed formation reaction rate ( $v_{2\text{HOBr}+\text{HOSO}_2^{\text{cat}}}$ ) of sulfate (where  $k_n$  is the rate constant for reaction n in the scheme given above):

$$v_{2\text{HOBr}+\text{HOSO}_2^{\text{cat}}} = \frac{d[\text{SO}_4^{2-}]}{dt} = k_6' [\text{HOSO}_2^-\text{-HOBr-M}] \quad (8')$$

$$k_5' [\text{HOBr-HOSO}_2^-] [\text{M}] - k_{-5}' [\text{HOSO}_2^-\text{-HOBr-M}] - k_6' [\text{HOSO}_2^-\text{-HOBr-M}] = 0$$

$$[\text{HOSO}_2^-\text{-HOBr-M}] = \frac{k_5' [\text{HOBr-HOSO}_2^-] [\text{M}]}{k_{-5}' + k_6'} \quad (8'-1)$$

$$k_1' [\text{HOBr}] [\text{HOSO}_2^-] - k_{-1}' [\text{HOBr-HOSO}_2^-] - k_5' [\text{HOBr-HOSO}_2^-] [\text{M}] = 0$$

$$[\text{HOBr-HOSO}_2^-] = \frac{k_1'}{k_{-1}' + k_5' [\text{M}]} [\text{HOBr}] [\text{HOSO}_2^-] \quad (8'-2)$$

$$v_{2\text{HOBr}+\text{HOSO}_2^{\text{cat}}} = \frac{d[\text{SO}_4^{2-}]}{dt} = \frac{k_1'}{k_{-1}' + k_5' [\text{M}]} \times \frac{k_5' \times k_6'}{k_{-5}' + k_6'} [\text{M}] [\text{HOBr}] [\text{HOSO}_2^-] \quad (8'-3)$$

The pseudo-unimolecular catalyzed S(IV) oxidation rate through Pathway 2(HOBr + HOSO<sub>2</sub><sup>-</sup>) can be written as

$$v_{2\text{HOBr}+\text{HOSO}_2^{\text{cat-S(IV)}}} = \frac{k_1'}{k_{-1}' + k_5' [\text{M}]} \times \frac{k_5' \times k_6'}{k_{-5}' + k_6'} [\text{M}] [\text{HOBr}] \quad (8'-4)$$

where  $k_5'/k_{-5}'$  symbolize the forward/reverse rate coefficients for the reaction 5' and  $k_6'$  is the unimolecular rate constant for the catalyzed reaction 6'. [M] is the concentration



of catalyst M.

### 3.1.3 S(IV) oxidation rates, related reaction rate constants and S(IV) lifetimes through Pathway 1(HOBr + HOSO<sub>2</sub><sup>-</sup>) and Pathway 2(HOBr + HOSO<sub>2</sub><sup>-</sup>)

Table S2. Calculated forward/reverse rate coefficients ( $k_1/k_{-1}$ ,  $k_4/k_{-4}$ ,  $k_8/k_{-8}$ ), diffusion rate constant  $k_2$ , the unimolecular rate constants ( $k_5$ ,  $k_9$ ) for the sulfate formation between HOBr and HOSO<sub>2</sub><sup>-</sup> through Pathway 1(HOBr + HOSO<sub>2</sub><sup>-</sup>).

| Catalyst                                    | Rate constants |                                                  | Rate constants |                                      |
|---------------------------------------------|----------------|--------------------------------------------------|----------------|--------------------------------------|
| Without catalyst                            | $k_1$          | $7.44 \times 10^9 \text{ M}^{-1} \text{ s}^{-1}$ | $k_{-1}$       | $5.65 \times 10^{10} \text{ s}^{-1}$ |
|                                             | $k_4$          | $7.81 \times 10^9 \text{ M}^{-1} \text{ s}^{-1}$ | $k_{-4}$       | $5.57 \times 10^9 \text{ s}^{-1}$    |
|                                             | $k_5$          | $8.05 \times 10^{-28} \text{ s}^{-1}$            |                |                                      |
| (H <sub>2</sub> O-catalyzed)                | $k_8$          | $7.81 \times 10^9 \text{ M}^{-1} \text{ s}^{-1}$ | $k_{-8}$       | $1.38 \times 10^{11} \text{ s}^{-1}$ |
|                                             | $k_9$          | $2.27 \times 10^{-8} \text{ s}^{-1}$             |                |                                      |
| (H <sub>2</sub> SO <sub>4</sub> -catalyzed) | $k_2$          | $7.48 \times 10^9 \text{ M}^{-1} \text{ s}^{-1}$ |                |                                      |
|                                             | $k_8$          | $7.44 \times 10^9 \text{ M}^{-1} \text{ s}^{-1}$ | $k_{-8}$       | $2.14 \times 10^8 \text{ s}^{-1}$    |
|                                             | $k_9$          | $4.96 \times 10^{-9} \text{ s}^{-1}$             |                |                                      |
| (HSO <sub>4</sub> <sup>-</sup> -catalyzed)  | $k_2$          | $3.24 \times 10^9 \text{ M}^{-1} \text{ s}^{-1}$ |                |                                      |
|                                             | $k_8$          | $3.23 \times 10^9 \text{ M}^{-1} \text{ s}^{-1}$ | $k_{-8}$       | $3.23 \times 10^9 \text{ s}^{-1}$    |
|                                             | $k_9$          | $7.39 \times 10^{-8} \text{ s}^{-1}$             |                |                                      |

Table S3. Calculated forward/reverse rate coefficients ( $k_1'/k_{-1}'$ ,  $k_5'/k_{-5}'$ ), the unimolecular rate constants ( $k_2'$ ,  $k_6'$ ) for the sulfate formation between HOBr and HOSO<sub>2</sub><sup>-</sup> through Pathway 2(HOBr + HOSO<sub>2</sub><sup>-</sup>).

| Catalyst                                    | Rate constants |                                                  | Rate constants |                                      |
|---------------------------------------------|----------------|--------------------------------------------------|----------------|--------------------------------------|
| Without catalyst                            | $k_1'$         | $7.44 \times 10^9 \text{ M}^{-1} \text{ s}^{-1}$ | $k_{-1}'$      | $6.68 \times 10^{10} \text{ s}^{-1}$ |
|                                             | $k_2'$         | $1.21 \times 10^{-4} \text{ s}^{-1}$             |                |                                      |
| (H <sub>2</sub> O-catalyzed)                | $k_5'$         | $7.92 \times 10^9 \text{ M}^{-1} \text{ s}^{-1}$ | $k_{-5}'$      | $1.63 \times 10^8 \text{ s}^{-1}$    |
|                                             | $k_6'$         | $1.61 \times 10^{-5} \text{ s}^{-1}$             |                |                                      |
| (H <sub>2</sub> SO <sub>4</sub> -catalyzed) | $k_5'$         | $7.48 \times 10^9 \text{ M}^{-1} \text{ s}^{-1}$ | $k_{-5}'$      | $1.54 \times 10^{-3} \text{ s}^{-1}$ |
|                                             | $k_6'$         | $7.00 \times 10^{-12} \text{ s}^{-1}$            |                |                                      |
| (HSO <sub>4</sub> <sup>-</sup> -catalyzed)  | $k_5'$         | $3.24 \times 10^9 \text{ M}^{-1} \text{ s}^{-1}$ | $k_{-5}'$      | $2.86 \times 10^7 \text{ s}^{-1}$    |
|                                             | $k_6'$         | $6.43 \times 10^{-5} \text{ s}^{-1}$             |                |                                      |

Table S4. Calculated overall rate constant, effective rate constant, S(IV) oxidation rate and the S(IV) lifetimes for Pathway 1(HOBr + HOSO<sub>2</sub><sup>-</sup>) and Pathway 2(HOBr + HOSO<sub>2</sub><sup>-</sup>) from HOSO<sub>2</sub><sup>-</sup> and HOBr respectively, assuming [HOBr] =  $5.89 \times 10^{-7} \text{ M}$  (corresponding to a Henry's law equilibrium with a gas phase HOBr mixing ratio of 0.31 ppbv), and [H<sub>2</sub>O] = 55.56 M (corresponding to the known bulk concentration of

H<sub>2</sub>O).

| Rate constants                                      | Catalysts                                              | Overall rate constant M <sup>-2</sup> s <sup>-1</sup> | Effective rate constant <sup>c</sup> (M <sup>-1</sup> s <sup>-1</sup> ) | S(IV) oxidation rate (s <sup>-1</sup> ) | S(IV) lifetime (s)    |
|-----------------------------------------------------|--------------------------------------------------------|-------------------------------------------------------|-------------------------------------------------------------------------|-----------------------------------------|-----------------------|
| Pathway1<br>(HOBr+HOSO <sub>2</sub> <sup>-</sup> )  | Without catalyst                                       | 6.61×10 <sup>-36</sup>                                | 6.61×10 <sup>-36</sup>                                                  | 3.89×10 <sup>-42</sup>                  | 2.57×10 <sup>41</sup> |
|                                                     | H <sub>2</sub> O-catalyzed                             | 1.34×10 <sup>-19</sup>                                | 7.43×10 <sup>-18</sup>                                                  | 4.38×10 <sup>-24</sup>                  | 2.28×10 <sup>23</sup> |
|                                                     | H <sub>2</sub> SO <sub>4</sub> -catalyzed <sup>a</sup> | 7.06×10 <sup>-16</sup>                                | 3.78×10 <sup>-23</sup>                                                  | 2.23×10 <sup>-29</sup>                  | 4.49×10 <sup>28</sup> |
|                                                     | HSO <sub>4</sub> <sup>-</sup> -catalyzed <sup>b</sup>  | 6.07×10 <sup>-16</sup>                                | 6.50×10 <sup>-23</sup>                                                  | 3.83×10 <sup>-29</sup>                  | 2.61×10 <sup>28</sup> |
| Pathway 2<br>(HOBr+HOSO <sub>2</sub> <sup>-</sup> ) | Without catalyst                                       | 1.35×10 <sup>-5</sup>                                 | 1.35×10 <sup>-5</sup>                                                   | 7.94×10 <sup>-12</sup>                  | 1.26×10 <sup>11</sup> |
|                                                     | H <sub>2</sub> O-catalyzed                             | 1.15×10 <sup>-5</sup>                                 | 6.39×10 <sup>-4</sup>                                                   | 3.76×10 <sup>-10</sup>                  | 2.66×10 <sup>9</sup>  |
|                                                     | H <sub>2</sub> SO <sub>4</sub> -catalyzed <sup>a</sup> | 3.79×10 <sup>0</sup>                                  | 2.03×10 <sup>-7</sup>                                                   | 1.20×10 <sup>-13</sup>                  | 8.35×10 <sup>12</sup> |
|                                                     | HSO <sub>4</sub> <sup>-</sup> -catalyzed <sup>b</sup>  | 8.10×10 <sup>-4</sup>                                 | 8.68×10 <sup>-11</sup>                                                  | 5.11×10 <sup>-17</sup>                  | 1.96×10 <sup>16</sup> |

<sup>a</sup> Assuming a half of general concentration of H<sup>+</sup> act as the possible high limit for the concentration of H<sub>2</sub>SO<sub>4</sub> in cloud water.

<sup>b</sup> Assuming a general concentration of H<sup>+</sup> act as the possible high limit for the concentration of HSO<sub>4</sub><sup>-</sup> in cloud water.

<sup>c</sup> Effective rate constant = Overall rate constant × [M], where [M] is the concentration of catalyst M.

### 3.2 The reaction rates between HOBr and SO<sub>3</sub><sup>2-</sup> leading to sulfate formation.

#### 3.2.1 The reaction rate via Pathway 1(HOBr + SO<sub>3</sub><sup>2-</sup>)

The detailed formation process of sulfate from HOBr and SO<sub>3</sub><sup>2-</sup> through the Pathway 1(HOBr + SO<sub>3</sub><sup>2-</sup>) is described by the following reaction equations:

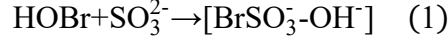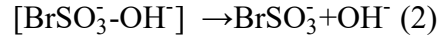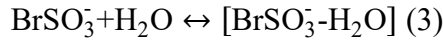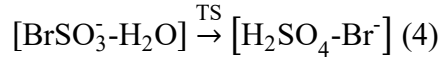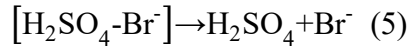

Applying the steady-state approximation to the pre-reactive complex and assuming that the complex is in equilibrium with the reactant, we obtain the following expressions for the uncatalyzed formation reaction rate ( $v_{1\text{HOBr} + \text{SO}_3^{2-}, \text{un}}$ ) of sulfate (where  $k_n$  is the rate constant for reaction n in the scheme given above):

$$v_{1\text{HOBr} + \text{SO}_3^{2-}, \text{un}} = \frac{d[\text{SO}_4^{2-}]}{dt} = k_4 [\text{BrSO}_3^- \text{-H}_2\text{O}] \quad (6)$$

$$k_3 [\text{BrSO}_3^-] [\text{H}_2\text{O}] - k_{-3} [\text{BrSO}_3^- \text{-H}_2\text{O}] - k_4 [\text{BrSO}_3^- \text{-H}_2\text{O}] = 0$$

$$[\text{BrSO}_3^- \text{-H}_2\text{O}] = \frac{k_3 [\text{BrSO}_3^-] [\text{H}_2\text{O}]}{k_{-3} + k_4} \quad (6-1)$$

$$k_2 [\text{BrSO}_3^- \text{-OH}^-] - k_3 [\text{BrSO}_3^-] [\text{H}_2\text{O}] = 0$$

$$[\text{BrSO}_3^-] = \frac{k_2 [\text{BrSO}_3^- \text{-OH}^-]}{k_3 [\text{H}_2\text{O}]} \quad (6-2)$$

$$k_1 [\text{HOBr}] [\text{SO}_3^{2-}] - k_2 [\text{BrSO}_3^- \text{-OH}^-] = 0$$

$$[\text{BrSO}_3^- \text{-OH}^-] = \frac{k_1 [\text{HOBr}] [\text{SO}_3^{2-}]}{k_2} \quad (6-3)$$

$$v_{1\text{HOBr} + \text{SO}_3^{2-}, \text{un}} = \frac{d[\text{SO}_4^{2-}]}{dt} = \frac{k_4 \times k_1}{k_{-3} + k_4} [\text{HOBr}] [\text{SO}_3^{2-}] \quad (6-4)$$

The pseudo-unimolecular uncatalyzed S(IV) oxidation rates through Pathway 1(HOBr + SO<sub>3</sub><sup>2-</sup>) can be written as

$$v_{1\text{HOBr} + \text{SO}_3^{2-}, \text{un-S(IV)}} = \frac{k_4 \times k_1}{k_{-3} + k_4} [\text{HOBr}] \quad (6-6)$$

where  $k_1$  is the diffusion rate constant between HOBr and SO<sub>3</sub><sup>2-</sup>,  $k_{-3}$  is the reverse rate

coefficients for the reaction 3 and  $k_4$  is the unimolecular rate constant for the uncatalyzed reaction 4.

The possible formation process of sulfate from  $\text{BrSO}_3^-$  and  $\text{OH}^-$  is described by the following reaction equations:

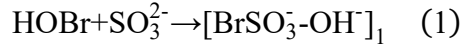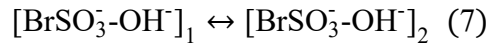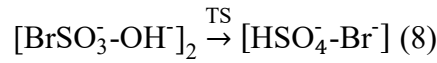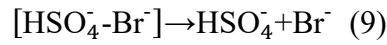

Applying the steady-state approximation to the pre-reactive complex and assuming that the complex is in equilibrium with the reactant, we obtain the following expressions for the uncatalyzed formation reaction rate ( $v_{1\text{HOBr} + \text{SO}_3^{2-}, \text{un}}$ ) of sulfate (where  $k_n$  is the rate constant for reaction n in the scheme given above):

$$v_{1\text{HOBr} + \text{SO}_3^{2-}, \text{un}} = \frac{d[\text{SO}_4^{2-}]}{dt} = k_8 [\text{BrSO}_3^- \text{-OH}^-] \quad (10)$$

$$k_7 [\text{BrSO}_3^- \text{-OH}^-]_1 - k_{-7} [\text{BrSO}_3^- \text{-OH}^-]_2 - k_8 [\text{BrSO}_3^- \text{-OH}^-]_2 = 0$$

$$[\text{BrSO}_3^- \text{-OH}^-]_2 = \frac{k_7 [\text{BrSO}_3^- \text{-OH}^-]_1}{k_{-7} + k_8} \quad (10-1)$$

$$k_1 [\text{HOBr}] [\text{SO}_3^{2-}] - k_7 [\text{BrSO}_3^- \text{-OH}^-]_1 = 0$$

$$[\text{BrSO}_3^- \text{-OH}^-]_1 = \frac{k_1 [\text{HOBr}] [\text{SO}_3^{2-}]}{k_7} \quad (10-2)$$

$$v_{1\text{HOBr} + \text{SO}_3^{2-}, \text{un}} = \frac{d[\text{SO}_4^{2-}]}{dt} = \frac{k_8 \times k_1}{k_{-7} + k_8} [\text{HOBr}] [\text{SO}_3^{2-}] \quad (10-3)$$

The pseudo-unimolecular uncatalyzed S(IV) oxidation rate through Pathway 1 ( $\text{HOBr} + \text{SO}_3^{2-}$ ) can be written as

$$v_{1\text{HOBr} + \text{SO}_3^{2-}, \text{un-S(IV)}} = \frac{d[\text{SO}_4^{2-}]}{dt} = \frac{k_8 \times k_1}{k_{-7} + k_8} [\text{HOBr}] \quad (10-4)$$

where  $k_7/k_{-7}$  symbolize the forward/reverse rate coefficients for the reaction 7 and  $k_8$  is the unimolecular rate constant for the reaction 8.

The catalyzed formation process of sulfate from HOBr and  $\text{SO}_3^{2-}$  through Pathway

1(HOBr + SO<sub>3</sub><sup>2-</sup>) is similarly described by the following reaction equations:

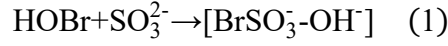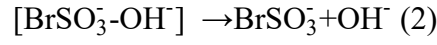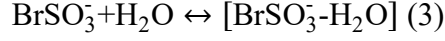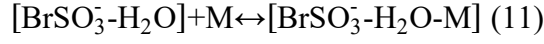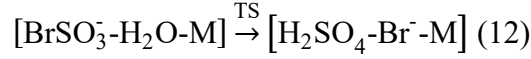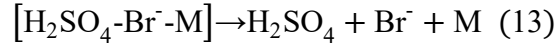

Applying the steady-state approximation to the pre-reactive complex and assuming that the complex is in equilibrium with the reactant, we obtain the following expressions for the catalyzed formation reaction rate ( $v_{1\text{HOBr} + \text{SO}_3^{2-}, \text{cat}}$ ) of sulfate (where  $k_n$  is the rate constant for reaction n in the scheme given above):

$$v_{1\text{HOBr} + \text{SO}_3^{2-}, \text{cat}} = \frac{d[\text{SO}_4^{2-}]}{dt} = k_{12}[\text{BrSO}_3\text{-H}_2\text{O-M}] \quad (14)$$

$$k_{11}[\text{BrSO}_3\text{-H}_2\text{O}][\text{M}] - k_{-11}[\text{BrSO}_3\text{-H}_2\text{O-M}] - k_{12}[\text{BrSO}_3\text{-H}_2\text{O-M}] = 0$$

$$[\text{BrSO}_3\text{-H}_2\text{O-M}] = \frac{k_{11}[\text{BrSO}_3\text{-H}_2\text{O}][\text{M}]}{k_{-11} + k_{12}} \quad (14-1)$$

$$k_3[\text{BrSO}_3][\text{H}_2\text{O}] - k_{-3}[\text{BrSO}_3\text{-H}_2\text{O}] - k_{11}[\text{BrSO}_3\text{-H}_2\text{O}][\text{M}] = 0$$

$$[\text{BrSO}_3\text{-H}_2\text{O}] = \frac{k_3[\text{BrSO}_3][\text{H}_2\text{O}]}{k_{-3} + k_{11}[\text{M}]} \quad (14-2)$$

$$k_2[\text{BrSO}_3\text{-OH}^-] - k_{-3}[\text{BrSO}_3][\text{H}_2\text{O}] = 0$$

$$[\text{BrSO}_3] = \frac{k_2[\text{BrSO}_3\text{-OH}^-]}{k_3[\text{H}_2\text{O}]} \quad (14-3)$$

$$k_1[\text{HOBr}][\text{SO}_3^{2-}] - k_2[\text{BrSO}_3\text{-OH}^-] = 0$$

$$[\text{BrSO}_3\text{-OH}^-] = \frac{k_1[\text{HOBr}][\text{SO}_3^{2-}]}{k_2} \quad (14-4)$$

$$v_{1\text{HOBr} + \text{SO}_3^{2-}, \text{cat}} = \frac{d[\text{SO}_4^{2-}]}{dt} = \frac{k_{12} \times k_{11}}{k_{-11} + k_{12}} \times \frac{k_1}{k_{-3} + k_{11}[\text{M}]} \times [\text{HOBr}][\text{SO}_3^{2-}][\text{M}] \quad (14-5)$$

The pseudo-unimolecular catalyzed S(IV) oxidation rate through Pathway 1(HOBr + SO<sub>3</sub><sup>2-</sup>) can then be written as

$$v_{1\text{HOBr} + \text{SO}_3^{2-}, \text{cat-S(IV)}} = \frac{k_{12} \times k_{11}}{k_{-11} + k_{12}} \times \frac{k_1}{k_{-3} + k_{11}[\text{M}]} \times [\text{HOBr}][\text{M}] \quad (14-6)$$

where  $k_{11}/k_{-11}$  symbolize the forward/reverse rate coefficients for the reaction 11 and

$k_{12}$  is the unimolecular rate constant for the catalyzed reaction 12.

The catalyzed formation process of sulfate from  $\text{BrSO}_3^-$  and  $\text{OH}^-$  is described by the following reaction equations:

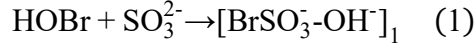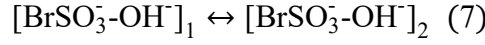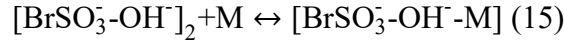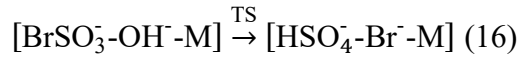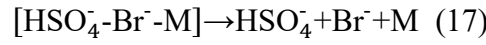

Applying the steady-state approximation to the pre-reactive complex and assuming that the complex is in equilibrium with the reactant, we obtain the following expressions for the catalyzed formation reaction rate ( $v_{1\text{HOBr} + \text{SO}_3^{2-}, \text{cat}}$ ) of sulfate (where  $k_n$  is the rate constant for reaction n in the scheme given above):

$$v_{1\text{HOBr} + \text{SO}_3^{2-}, \text{cat}} = \frac{d[\text{SO}_4^{2-}]}{dt} = k_{16} [\text{BrSO}_3^- \text{-OH}^- \text{-M}] \quad (18)$$

$$k_{15} [\text{BrSO}_3^- \text{-OH}^-]_2 [\text{M}] - k_{15} [\text{BrSO}_3^- \text{-OH}^- \text{-M}] - k_{16} [\text{BrSO}_3^- \text{-OH}^- \text{-M}] = 0$$

$$[\text{BrSO}_3^- \text{-OH}^- \text{-M}] = \frac{k_{15} [\text{BrSO}_3^- \text{-OH}^-]_2 [\text{M}]}{k_{15} + k_{16}} \quad (18-1)$$

$$k_7 [\text{BrSO}_3^- \text{-OH}^-]_1 - k_{-7} [\text{BrSO}_3^- \text{-OH}^-]_2 - k_{15} [\text{BrSO}_3^- \text{-OH}^-]_2 [\text{M}]$$

$$[\text{BrSO}_3^- \text{-OH}^-]_2 = \frac{k_7 [\text{BrSO}_3^- \text{-OH}^-]_1}{k_{-7} + k_{15} [\text{M}]} \quad (18-2)$$

$$k_1 [\text{HOBr}] [\text{SO}_3^{2-}] - k_7 [\text{BrSO}_3^- \text{-OH}^-]_1 = 0$$

$$[\text{BrSO}_3^- \text{-OH}^-]_1 = \frac{k_1 [\text{HOBr}] [\text{SO}_3^{2-}]}{k_8} \quad (18-3)$$

$$v_{1\text{HOBr} + \text{SO}_3^{2-}, \text{cat}} = \frac{d[\text{SO}_4^{2-}]}{dt} = \frac{k_{16} \times k_{15}}{k_{15} + k_{16}} \times \frac{k_1}{k_{-7} + k_{15} [\text{M}]} \times [\text{HOBr}] [\text{SO}_3^{2-}] [\text{M}] \quad (18-4)$$

The pseudo-unimolecular catalyzed S(IV) oxidation rate through Pathway 1 ( $\text{HOBr} + \text{SO}_3^{2-}$ ) can be written as

$$v_{1\text{HOBr} + \text{SO}_3^{2-}, \text{cat-S(IV)}} = \frac{d[\text{SO}_4^{2-}]}{dt} = \frac{k_{16} \times k_{15}}{k_{15} + k_{16}} \times \frac{k_1}{k_{-7} + k_{15} [\text{M}]} \times [\text{HOBr}] [\text{M}] \quad (18-5)$$

where  $k_{15}/k_{-15}$  symbolize the forward/reverse rate coefficients for the reaction 15 and  $k_{16}$  is the unimolecular rate constant for the reaction 16.

### 3.2.2 The reaction rate via Pathway 2(HOBr + SO<sub>3</sub><sup>2-</sup>)

The detailed formation process of sulfate from HOBr and SO<sub>3</sub><sup>2-</sup> through the Pathway 2(HOBr + SO<sub>3</sub><sup>2-</sup>) is described by the following reaction equations:

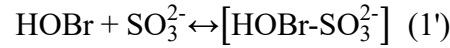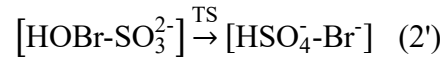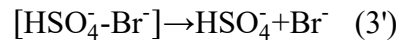

Applying the steady-state approximation to the pre-reactive complex and assuming that the complex is in equilibrium with the reactant, we obtain the following expressions for the formation reaction rate ( $v_{2\text{HOBr} + \text{SO}_3^{2-}, \text{un}}$ ) of sulfate (where  $k_n$  is the rate constant for reaction n in the scheme given above):

$$v_{2\text{HOBr} + \text{SO}_3^{2-}, \text{un}} = \frac{d[\text{SO}_4^{2-}]}{dt} = k_2 [\text{HOBr-SO}_3^{2-}] \quad (4')$$

$$k_{1'} [\text{HOBr}] [\text{SO}_3^{2-}] - k_{-1'} [\text{HOBr-SO}_3^{2-}] - k_2 [\text{HOBr-SO}_3^{2-}] = 0$$

$$[\text{HOBr-SO}_3^{2-}] = \frac{k_{1'} [\text{HOBr}] [\text{SO}_3^{2-}]}{k_{-1'} + k_2} \quad (4'-1)$$

$$v_{2\text{HOBr} + \text{SO}_3^{2-}, \text{un}} = \frac{d[\text{SO}_4^{2-}]}{dt} = \frac{k_1 \times k_2}{k_{-1'} + k_2} [\text{HOBr}] [\text{SO}_3^{2-}] \quad (4'-2)$$

The pseudo-unimolecular catalyzed S(IV) oxidation rates through Pathway 2(HOBr + SO<sub>3</sub><sup>2-</sup>) can be written as

$$v_{2\text{HOBr} + \text{SO}_3^{2-}, \text{un-S(IV)}} = \frac{k_1 \times k_2}{k_{-1'} + k_2} [\text{HOBr}] \quad (4'-3)$$

where  $k_{1'}/k_{-1'}$  symbolize the forward/reverse rate coefficients for the reaction 1', and  $k_2$  is the unimolecular rate constant for the reaction 2'.

The catalyzed formation process of sulfate from HOBr and SO<sub>3</sub><sup>2-</sup> through Pathway 2(HOBr + SO<sub>3</sub><sup>2-</sup>) is described by the following reaction equations:

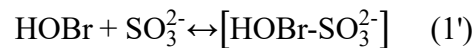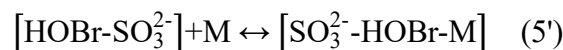

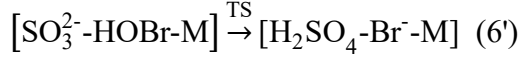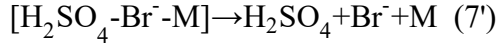

Applying the steady-state approximation to the pre-reactive complex and assuming that the complex is in equilibrium with the reactant, we obtain the following expressions for the catalyzed formation reaction rate ( $v_{2\text{HOBr} + \text{SO}_3^{2-}, \text{cat}}$ ) of sulfate (where  $k_n$  is the rate constant for reaction n in the scheme given above):

$$v_{2\text{HOBr} + \text{SO}_3^{2-}, \text{cat}} = \frac{d[\text{SO}_4^{2-}]}{dt} = k_6' [\text{SO}_3^{2-}\text{-HOBr-M}] \quad (8')$$

$$k_5' [\text{HOBr-SO}_3^{2-}] [\text{M}] - k_{-5}' [\text{SO}_3^{2-}\text{-HOBr-M}] - k_6' [\text{SO}_3^{2-}\text{-HOBr-M}] = 0$$

$$[\text{SO}_3^{2-}\text{-HOBr-M}] = \frac{k_5' [\text{HOBr-SO}_3^{2-}] [\text{M}]}{k_{-5}' + k_6'} \quad (8'-1)$$

$$k_1' [\text{HOBr}] [\text{SO}_3^{2-}] - k_{-1}' [\text{HOBr-SO}_3^{2-}] - k_5' [\text{HOBr-SO}_3^{2-}] [\text{M}] = 0$$

$$[\text{HOBr-SO}_3^{2-}] = \frac{k_1' [\text{HOBr}] [\text{SO}_3^{2-}]}{k_{-1}' + k_5' [\text{M}]} \quad (8'-2)$$

$$v_{2\text{HOBr} + \text{SO}_3^{2-}, \text{cat}} = \frac{d[\text{SO}_4^{2-}]}{dt} = \frac{k_5' \times k_6'}{k_{-5}' + k_6'} \times \frac{k_1'}{k_{-1}' + k_5' [\text{M}]} \times [\text{M}] [\text{HOBr}] [\text{SO}_3^{2-}] \quad (8'-3)$$

The pseudo-unimolecular catalyzed S(IV) oxidation rate through Pathway 2(HOBr+SO<sub>3</sub><sup>2-</sup>) can be written as

$$v_{2\text{HOBr} + \text{SO}_3^{2-}, \text{cat-S(IV)}} = \frac{k_5' \times k_6'}{k_{-5}' + k_6'} \times \frac{k_1'}{k_{-1}' + k_5' [\text{M}]} \times [\text{M}] [\text{HOBr}] \quad (8'-4)$$

where  $k_5'/k_{-5}'$  symbolize the forward/reverse rate coefficients for the reaction 5' and  $k_6'$  is the unimolecular rate constant for the catalyzed reaction 6'. [M] is the concentration of catalyst M.

### 3.2.3 S(IV) oxidation rates, related reaction rate constants and S(IV) lifetimes through Pathway 1(HOBr + SO<sub>3</sub><sup>2-</sup>) and Pathway 2(HOBr + SO<sub>3</sub><sup>2-</sup>)

Table S5. Calculated diffusion rate constant ( $k_1$ ) between HOBr and SO<sub>3</sub><sup>2-</sup>, the forward/reverse rate coefficients ( $k_3/k_{-3}$ ,  $k_7/k_{-7}$ ,  $k_{11}/k_{-11}$ ,  $k_{15}/k_{-15}$ ), and the unimolecular rate constants ( $k_4$ ,  $k_8$ ,  $k_{12}$ ,  $k_{16}$ ) for the sulfate formation between HOBr and SO<sub>3</sub><sup>2-</sup> through Pathway 1(HOBr + SO<sub>3</sub><sup>2-</sup>).



| Catalyst                                   | Rate constants |                                                  | Rate constants |                                      |
|--------------------------------------------|----------------|--------------------------------------------------|----------------|--------------------------------------|
| Without                                    | $k_1$          | $7.45 \times 10^9 \text{ M}^{-1} \text{ s}^{-1}$ |                |                                      |
|                                            | $k_3$          | $7.81 \times 10^9 \text{ M}^{-1} \text{ s}^{-1}$ | $k_{-3}$       | $5.57 \times 10^9 \text{ s}^{-1}$    |
|                                            | $k_4$          | $8.05 \times 10^{-28} \text{ s}^{-1}$            |                |                                      |
|                                            | $k_7$          | $1.44 \times 10^9 \text{ s}^{-1}$                | $k_{-7}$       | $3.34 \times 10^9 \text{ s}^{-1}$    |
| (H <sub>2</sub> O-catalyzed)               | $k_8$          | $1.03 \text{ s}^{-1}$                            |                |                                      |
|                                            | $k_{11}$       | $7.81 \times 10^9 \text{ M}^{-1} \text{ s}^{-1}$ | $k_{-11}$      | $1.38 \times 10^{11} \text{ s}^{-1}$ |
|                                            | $k_{12}$       | $2.27 \times 10^{-8} \text{ s}^{-1}$             |                |                                      |
|                                            | $k_{15}$       | $7.98 \times 10^9 \text{ M}^{-1} \text{ s}^{-1}$ | $k_{-15}$      | $1.26 \times 10^{12} \text{ s}^{-1}$ |
| (HSO <sub>4</sub> <sup>-</sup> -catalyzed) | $k_{16}$       | $4.70 \text{ s}^{-1}$                            |                |                                      |
|                                            | $k_{11}$       | $3.23 \times 10^9 \text{ M}^{-1} \text{ s}^{-1}$ | $k_{-11}$      | $3.23 \times 10^9 \text{ s}^{-1}$    |
|                                            | $k_{12}$       | $7.39 \times 10^{-8} \text{ s}^{-1}$             |                |                                      |
|                                            | $k_{15}$       | $3.25 \times 10^9 \text{ M}^{-1} \text{ s}^{-1}$ | $k_{-15}$      | $2.04 \times 10^{-4} \text{ s}^{-1}$ |
|                                            | $k_{16}$       | $1.25 \times 10^{-4} \text{ s}^{-1}$             |                |                                      |

Table S6. Calculated forward/reverse rate coefficients ( $k_1/k_{-1}$ ,  $k_5/k_{-5}$ ), and the unimolecular rate constant ( $k_2$ ,  $k_6$ ) for the sulfate formation between HOBr and SO<sub>3</sub><sup>2-</sup> through Pathway 2 (HOBr + SO<sub>3</sub><sup>2-</sup>).

| Catalyst                                   | Rate constants |                                                  | Rate constants |                                   |
|--------------------------------------------|----------------|--------------------------------------------------|----------------|-----------------------------------|
| Without catalyst                           | $k_1$          | $7.45 \times 10^9 \text{ M}^{-1} \text{ s}^{-1}$ | $k_{-1}$       | $4.49 \times 10^9 \text{ s}^{-1}$ |
|                                            | $k_2$          | $3.50 \times 10^5 \text{ s}^{-1}$                |                |                                   |
| (H <sub>2</sub> O-catalyzed)               | $k_5$          | $7.96 \times 10^9 \text{ M}^{-1} \text{ s}^{-1}$ | $k_{-5}$       | $3.42 \times 10^9 \text{ s}^{-1}$ |
|                                            | $k_6$          | $4.18 \times 10^5 \text{ s}^{-1}$                |                |                                   |
| (HSO <sub>4</sub> <sup>-</sup> -catalyzed) | $k_5$          | $3.24 \times 10^9 \text{ M}^{-1} \text{ s}^{-1}$ | $k_{-5}$       | $1.12 \text{ s}^{-1}$             |
|                                            | $k_6$          | $5.19 \times 10^{-3} \text{ s}^{-1}$             |                |                                   |

Table S7. Calculated overall rate constant, effective rate constant, S(IV) oxidation rate and the S(IV) lifetimes for Pathway 1 (HOBr + SO<sub>3</sub><sup>2-</sup>) and Pathway 2 (HOBr + SO<sub>3</sub><sup>2-</sup>) from SO<sub>3</sub><sup>2-</sup> and HOBr respectively, assuming [HOBr] =  $5.89 \times 10^{-7} \text{ M}$  (corresponding to a Henry's law equilibrium with a gas phase HOBr mixing ratio of 0.31 ppbv), and [H<sub>2</sub>O] =  $55.56 \text{ M}$  (corresponding to the known bulk concentration of H<sub>2</sub>O).

| Rate constants                                                    | Catalysts                                             | Overall rate constant $\text{M}^{-2} \text{ s}^{-1}$ | Effective rate constant <sup>d</sup> ( $\text{M}^{-1} \text{ s}^{-1}$ ) | S(IV) oxidation rate ( $\text{s}^{-1}$ ) | S(IV) lifetime (s)    |
|-------------------------------------------------------------------|-------------------------------------------------------|------------------------------------------------------|-------------------------------------------------------------------------|------------------------------------------|-----------------------|
| Pathway 1 <sup>a</sup><br>(HOBr + SO <sub>3</sub> <sup>2-</sup> ) | Without catalyst                                      | $1.08 \times 10^{-27}$                               | $1.08 \times 10^{-27}$                                                  | $6.34 \times 10^{-34}$                   | $1.58 \times 10^{33}$ |
|                                                                   | H <sub>2</sub> O-catalyzed                            | $2.18 \times 10^{-11}$                               | $1.21 \times 10^{-9}$                                                   | $7.13 \times 10^{-16}$                   | $1.40 \times 10^{15}$ |
|                                                                   | HSO <sub>4</sub> <sup>-</sup> -catalyzed <sup>c</sup> | $9.88 \times 10^{-8}$                                | $1.24 \times 10^{-16}$                                                  | $7.33 \times 10^{-23}$                   | $1.36 \times 10^{22}$ |
| Pathway 1 <sup>b</sup><br>(HOBr + SO <sub>3</sub> <sup>2-</sup> ) | Without catalyst                                      | 2.30                                                 | 2.30                                                                    | $1.35 \times 10^{-6}$                    | $7.39 \times 10^5$    |
|                                                                   | H <sub>2</sub> O-catalyzed                            | $1.24 \times 10^1$                                   | $6.90 \times 10^2$                                                      | $4.07 \times 10^{-4}$                    | $2.46 \times 10^3$    |
|                                                                   | HSO <sub>4</sub> <sup>-</sup> -catalyzed <sup>c</sup> | $2.74 \times 10^9$                                   | $3.45 \times 10^0$                                                      | $2.03 \times 10^{-6}$                    | $4.92 \times 10^5$    |
| Pathway 2<br>(HOBr + SO <sub>3</sub> <sup>2-</sup> )              | Without catalyst                                      | $5.80 \times 10^5$                                   | $5.80 \times 10^5$                                                      | $3.42 \times 10^{-1}$                    | $2.93 \times 10^0$    |
|                                                                   | H <sub>2</sub> O-catalyzed                            | $1.62 \times 10^4$                                   | $9.01 \times 10^5$                                                      | $5.31 \times 10^{-1}$                    | $1.88 \times 10^0$    |

|                                                       |                      |                       |                       |                      |
|-------------------------------------------------------|----------------------|-----------------------|-----------------------|----------------------|
| HSO <sub>4</sub> <sup>-</sup> -catalyzed <sup>c</sup> | 2.48×10 <sup>7</sup> | 3.12×10 <sup>-2</sup> | 1.84×10 <sup>-8</sup> | 5.44×10 <sup>7</sup> |
|-------------------------------------------------------|----------------------|-----------------------|-----------------------|----------------------|

<sup>a</sup> The second step of Pathway 1(HOBr + SO<sub>3</sub><sup>2-</sup>) leading to sulfate formation through the hydrolysis reaction.

<sup>b</sup> The second step of Pathway 1(HOBr + SO<sub>3</sub><sup>2-</sup>) leading to sulfate formation through the reaction of BrSO<sub>3</sub><sup>-</sup> intermediate with OH<sup>-</sup>.

<sup>c</sup> Assuming a general concentration of H<sup>+</sup> act as the possible high limit for the concentration of HSO<sub>4</sub><sup>-</sup> in cloud water.

<sup>d</sup> Effective rate constant = Overall rate constant × [M], where [M] is the concentration of catalyst M.

### 3.3 The reaction rates between $\text{OBr}^-$ and $\text{SO}_3^{2-}$ leading to sulfate formation.

#### 3.3.1 The reaction rate via Pathway 1( $\text{OBr}^- + \text{SO}_3^{2-}$ )

The detailed formation process of sulfate from  $\text{OBr}^-$  and  $\text{SO}_3^{2-}$  through Pathway 1( $\text{OBr}^- + \text{SO}_3^{2-}$ ) is described by the following reaction equations:

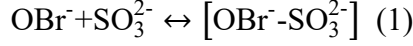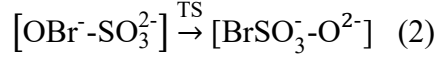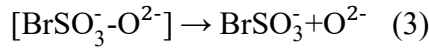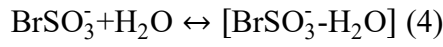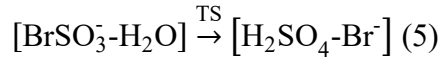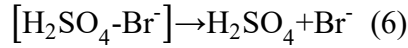

Applying the steady-state approximation to the pre-reactive complex and assuming that the complex is in equilibrium with the reactant, we obtain the following expressions for the uncatalyzed formation reaction rate ( $v_{1\text{OBr}^- + \text{SO}_3^{2-}, \text{un}}$ ) of sulfate (where  $k_n$  is the rate constant for reaction n in the scheme given above):

$$v_{1\text{OBr}^- + \text{SO}_3^{2-}, \text{un}} = \frac{d[\text{SO}_4^{2-}]}{dt} = k_5[\text{BrSO}_3^- - \text{H}_2\text{O}] \quad (7)$$

$$k_4[\text{BrSO}_3^-][\text{H}_2\text{O}] - k_{-4}[\text{BrSO}_3^- - \text{H}_2\text{O}] - k_5[\text{BrSO}_3^- - \text{H}_2\text{O}] = 0$$

$$[\text{BrSO}_3^- - \text{H}_2\text{O}] = \frac{k_4[\text{BrSO}_3^-][\text{H}_2\text{O}]}{k_{-4} + k_5} \quad (7-1)$$

$$k_3[\text{BrSO}_3^- - \text{O}^{2-}] - k_4[\text{BrSO}_3^-][\text{H}_2\text{O}] = 0$$

$$[\text{BrSO}_3^-] = \frac{k_3[\text{BrSO}_3^- - \text{O}^{2-}]}{k_4[\text{H}_2\text{O}]} \quad (7-2)$$

$$k_2[\text{OBr}^- - \text{SO}_3^{2-}] - k_3[\text{BrSO}_3^- - \text{O}^{2-}] = 0$$

$$[\text{BrSO}_3^- - \text{O}^{2-}] = \frac{k_2[\text{OBr}^- - \text{SO}_3^{2-}]}{k_3} \quad (7-3)$$

$$k_1[\text{OBr}^-][\text{SO}_3^{2-}] - k_{-1}[\text{OBr}^- - \text{SO}_3^{2-}] - k_2[\text{OBr}^- - \text{SO}_3^{2-}] = 0$$

$$[\text{OBr}^- - \text{SO}_3^{2-}] = \frac{k_1[\text{OBr}^-][\text{SO}_3^{2-}]}{k_{-1} + k_2} \quad (7-4)$$

$$v_{1\text{OBr}^- + \text{SO}_3^{2-}, \text{un}} = \frac{d[\text{SO}_4^{2-}]}{dt} = \frac{k_5}{k_{-4} + k_5} \times \frac{k_2 \times k_1}{k_{-1} + k_2} [\text{OBr}^-][\text{SO}_3^{2-}] \quad (7-6)$$

The pseudo-unimolecular uncatalyzed S(IV) oxidation rate through Pathway 1(OBr<sup>-</sup> + SO<sub>3</sub><sup>2-</sup>) can be written as

$$v_{1\text{OBr}^- + \text{SO}_3^{2-}, \text{un-S(IV)}} = \frac{k_5}{k_{-4} + k_5} \times \frac{k_2 \times k_1}{k_{-1} + k_2} [\text{OBr}^-][\text{SO}_3^{2-}] \quad (7-7)$$

where  $k_1/k_{-1}$  and  $k_{-4}$  symbolize the forward/reverse and reverse rate coefficients for the reactions 1 and 4, respectively, as well as  $k_2$  and  $k_5$  are the unimolecular rate constants for the uncatalyzed reactions 2 and 5.

The possible formation process of sulfate from BrSO<sub>3</sub><sup>-</sup> and OH<sup>-</sup> is described by the following reaction equations:

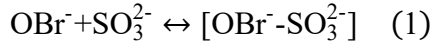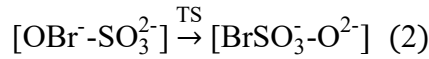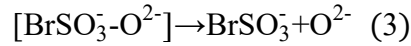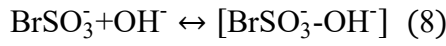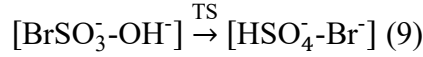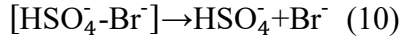

Applying the steady-state approximation to the pre-reactive complex and assuming that the complex is in equilibrium with the reactant, we obtain the following expressions for the uncatalyzed formation reaction rate ( $v_{1\text{OBr}^- + \text{SO}_3^{2-}, \text{un}}$ ) of sulfate (where  $k_n$  is the rate constant for reaction n in the scheme given above):

$$v_{1\text{OBr}^- + \text{SO}_3^{2-}, \text{un}} = \frac{d[\text{SO}_4^{2-}]}{dt} = k_9 [\text{BrSO}_3^- - \text{OH}^-] \quad (11)$$

$$k_8 [\text{BrSO}_3^-][\text{OH}^-] - k_{-8} [\text{BrSO}_3^- - \text{OH}^-] - k_9 [\text{BrSO}_3^- - \text{OH}^-] = 0$$

$$[\text{BrSO}_3^- - \text{OH}^-] = \frac{k_8 [\text{BrSO}_3^-][\text{OH}^-]}{k_{-8} + k_9} \quad (11-1)$$

$$k_3 [\text{BrSO}_3^- - \text{O}^{2-}] - k_8 [\text{BrSO}_3^-][\text{OH}^-] = 0$$

$$[\text{BrSO}_3^-] = \frac{k_3 [\text{BrSO}_3^- - \text{O}^{2-}]}{k_8 [\text{OH}^-]} \quad (11-2)$$

$$k_2 [\text{OBr}^- - \text{SO}_3^{2-}] - k_3 [\text{BrSO}_3^- - \text{O}^{2-}] = 0$$

$$[\text{BrSO}_3^- \text{O}^{2-}] = \frac{k_2[\text{OBr}^- \text{SO}_3^{2-}]}{k_3} \quad (11-3)$$

$$k_1[\text{OBr}^-][\text{SO}_3^{2-}] - k_{-1}[\text{OBr}^- \text{SO}_3^{2-}] - k_2[\text{OBr}^- \text{SO}_3^{2-}] = 0$$

$$[\text{OBr}^- \text{SO}_3^{2-}] = \frac{k_1[\text{OBr}^-][\text{SO}_3^{2-}]}{k_{-1} + k_2} \quad (11-4)$$

$$v_{1\text{OBr}^- + \text{SO}_3^{2-}, \text{un}} = \frac{d[\text{SO}_4^{2-}]}{dt} = \frac{k_9}{k_{-8} + k_9} \times \frac{k_2 \times k_1}{k_{-1} + k_2} [\text{OBr}^-][\text{SO}_3^{2-}] \quad (11-5)$$

The pseudo-unimolecular catalyzed S(IV) oxidation rate through Pathway 1(OBr<sup>-</sup> + SO<sub>3</sub><sup>2-</sup>) can be written as

$$v_{1\text{OBr}^- + \text{SO}_3^{2-}, \text{un-S(IV)}} = \frac{k_9}{k_{-8} + k_9} \times \frac{k_2 \times k_1}{k_{-1} + k_2} [\text{OBr}^-] \quad (11-6)$$

where  $k_{-8}$  symbolizes the reverse rate coefficients for the reaction 8, and  $k_9$  is the unimolecular rate constant for the reaction 9.

The detailed catalyzed formation process of sulfate from OBr<sup>-</sup> and SO<sub>3</sub><sup>2-</sup> through Pathway 1(OBr<sup>-</sup> + SO<sub>3</sub><sup>2-</sup>) is similarly described by the following reaction equations:

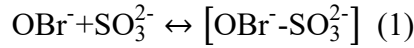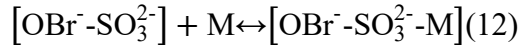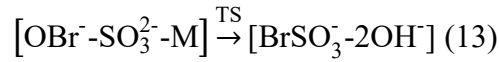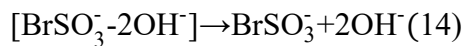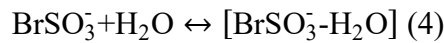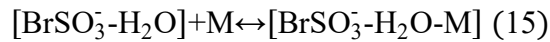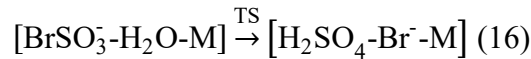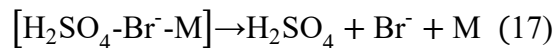

Applying the steady-state approximation to the pre-reactive complex and assuming that the complex is in equilibrium with the reactant, we obtain the following expressions for the catalyzed formation reaction rate ( $v_{1\text{OBr}^- + \text{SO}_3^{2-}, \text{cat}}$ ) of sulfate (where  $k_n$  is the rate constant for reaction n in the scheme given above):

$$v_{\text{OBr}^- + \text{SO}_3^{2-}, \text{cat}} = \frac{d[\text{SO}_4^{2-}]}{dt} = k_{16}[\text{BrSO}_3^- \text{H}_2\text{O} \cdot \text{M}] \quad (18)$$

$$k_{15}[\text{BrSO}_3^- \text{H}_2\text{O}] [\text{M}] - k_{-15}[\text{BrSO}_3^- \text{H}_2\text{O} \cdot \text{M}] - k_{16}[\text{BrSO}_3^- \text{H}_2\text{O} \cdot \text{M}] = 0$$

$$[\text{BrSO}_3^- \text{H}_2\text{O} \cdot \text{M}] = \frac{k_{15}[\text{BrSO}_3^- \text{H}_2\text{O}] [\text{M}]}{k_{-15} + k_{16}} \quad (18-1)$$

$$k_4[\text{BrSO}_3^-] [\text{H}_2\text{O}] - k_{-4}[\text{BrSO}_3^- \text{H}_2\text{O}] - k_{15}[\text{BrSO}_3^- \text{H}_2\text{O}] [\text{M}] = 0$$

$$[\text{BrSO}_3^- \text{H}_2\text{O}] = \frac{k_4 [\text{BrSO}_3^-] [\text{H}_2\text{O}]}{k_{-4} + k_{15} [\text{M}]} \quad (18-2)$$

$$k_{14}[\text{BrSO}_3^- \cdot 2\text{OH}^-] - k_4[\text{BrSO}_3^-] [\text{H}_2\text{O}] = 0$$

$$[\text{BrSO}_3^-] = \frac{k_{14}[\text{BrSO}_3^- \cdot 2\text{OH}^-]}{k_4 [\text{H}_2\text{O}]} \quad (18-3)$$

$$k_{13}[\text{OBr}^- \cdot \text{SO}_3^{2-} \cdot \text{M}] - k_{14}[\text{BrSO}_3^- \cdot 2\text{OH}^-] = 0$$

$$[\text{BrSO}_3^- \cdot 2\text{OH}^-] = \frac{k_{13}[\text{OBr}^- \cdot \text{SO}_3^{2-} \cdot \text{M}]}{k_{14}} \quad (18-4)$$

$$k_{12}[\text{OBr}^- \cdot \text{SO}_3^{2-}] [\text{M}] - k_{-12}[\text{OBr}^- \cdot \text{SO}_3^{2-} \cdot \text{M}] - k_{13}[\text{OBr}^- \cdot \text{SO}_3^{2-} \cdot \text{M}] = 0$$

$$[\text{OBr}^- \cdot \text{SO}_3^{2-} \cdot \text{M}] = \frac{k_{12}[\text{OBr}^- \cdot \text{SO}_3^{2-}] [\text{M}]}{k_{-12} + k_{13}} \quad (18-5)$$

$$k_1[\text{OBr}^-] [\text{SO}_3^{2-}] - k_{-1}[\text{OBr}^- \cdot \text{SO}_3^{2-}] - k_{12}[\text{OBr}^- \cdot \text{SO}_3^{2-}] [\text{M}] = 0$$

$$[\text{OBr}^- \cdot \text{SO}_3^{2-}] = \frac{k_1[\text{OBr}^-] [\text{SO}_3^{2-}]}{k_{-1} + k_{12} [\text{M}]} \quad (18-6)$$

$$= \frac{k_{16} \times k_{15}}{k_{-15} + k_{16}} \times \frac{1}{k_{-4} + k_{15} [\text{M}]} \times \frac{k_{12} \times k_{13}}{k_{-12} + k_{13}} \times \frac{k_1}{k_{-1} + k_{12} [\text{M}]} [\text{OBr}^-] [\text{SO}_3^{2-}] [\text{M}] [\text{M}] \quad (18-7)$$

The pseudo-unimolecular catalyzed S(IV) oxidation rate through Pathway 1 (OBr<sup>-</sup> + SO<sub>3</sub><sup>2-</sup>) can be written as

$$v_{\text{OBr}^- + \text{SO}_3^{2-}, \text{cat-S(IV)}} = \frac{k_{16} \times k_{15}}{k_{-15} + k_{16}} \times \frac{1}{k_{-4} + k_{15} [\text{M}]} \times \frac{k_{12} \times k_{13}}{k_{-12} + k_{13}} \times \frac{k_1}{k_{-1} + k_{12} [\text{M}]} [\text{OBr}^-] [\text{M}] [\text{M}] \quad (18-8)$$

where  $k_{12}/k_{-12}$  and  $k_{15}/k_{-15}$  symbolize the forward/reverse rate coefficients for the reactions 12 and 15, respectively, as well as  $k_{13}$  and  $k_{16}$  are the unimolecular rate constants for the catalyzed reactions 13 and 16. In addition,  $[\text{M}]$  is the concentration of catalyst M.

The catalyzed formation process of sulfate from  $\text{BrSO}_3^-$  and  $\text{OH}^-$  is described by the following reaction equations:

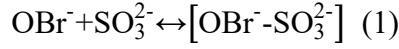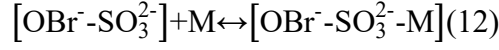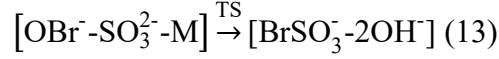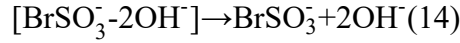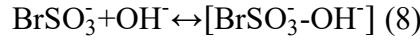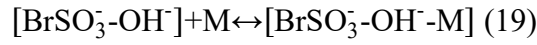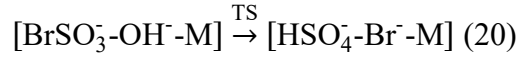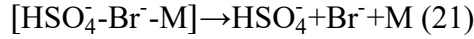

Applying the steady-state approximation to the pre-reactive complex and assuming that the complex is in equilibrium with the reactant, we obtain the following expressions for the catalyzed formation reaction rate ( $v_{1\text{OBr}^- + \text{SO}_3^{2-}, \text{cat}}$ ) of sulfate (where  $k_n$  is the rate constant for reaction n in the scheme given above):

$$v_{1\text{OBr}^- + \text{SO}_3^{2-}, \text{cat}} = \frac{d[\text{SO}_4^{2-}]}{dt} = k_{20} [\text{BrSO}_3^- - \text{OH}^- - \text{M}] \quad (22)$$

$$k_{19} [\text{BrSO}_3^- - \text{OH}^-] [\text{M}] - k_{-19} [\text{BrSO}_3^- - \text{OH}^- - \text{M}] - k_{20} [\text{BrSO}_3^- - \text{OH}^- - \text{M}] = 0$$

$$[\text{BrSO}_3^- - \text{OH}^- - \text{M}] = \frac{k_{19} [\text{BrSO}_3^- - \text{OH}^-] [\text{M}]}{k_{-19} + k_{20}} \quad (22-1)$$

$$k_8 [\text{BrSO}_3^-] [\text{OH}^-] - k_{-8} [\text{BrSO}_3^- - \text{OH}^-] - k_{19} [\text{BrSO}_3^- - \text{OH}^-] [\text{M}] = 0$$

$$[\text{BrSO}_3^- - \text{OH}^-] = \frac{k_8 [\text{BrSO}_3^-] [\text{OH}^-]}{k_{-8} + k_{19} [\text{M}]} \quad (22-2)$$

$$k_{14} [\text{BrSO}_3^- - 2\text{OH}^-] - k_8 [\text{BrSO}_3^-] [\text{OH}^-] = 0$$

$$[\text{BrSO}_3^-] = \frac{k_{14} [\text{BrSO}_3^- - 2\text{OH}^-]}{k_8 [\text{OH}^-]} \quad (22-3)$$

$$k_{13} [\text{OBr}^- - \text{SO}_3^{2-} - \text{M}] - k_{14} [\text{BrSO}_3^- - 2\text{OH}^-] = 0$$

$$[\text{BrSO}_3^- - 2\text{OH}^-] = \frac{k_{13} [\text{OBr}^- - \text{SO}_3^{2-} - \text{M}]}{k_{14}} \quad (22-4)$$

$$k_{12} [\text{OBr}^- - \text{SO}_3^{2-}] [\text{M}] - k_{-12} [\text{OBr}^- - \text{SO}_3^{2-} - \text{M}] - k_{13} [\text{OBr}^- - \text{SO}_3^{2-} - \text{M}] = 0$$

$$[\text{OBr}^- \cdot \text{SO}_3^{2-} \cdot \text{M}] = \frac{k_{12}[\text{OBr}^- \cdot \text{SO}_3^{2-}][\text{M}]}{k_{-12} + k_{13}} \quad (22-5)$$

$$k_1[\text{OBr}^-][\text{SO}_3^{2-}] - k_{-1}[\text{OBr}^- \cdot \text{SO}_3^{2-}] - k_{12}[\text{OBr}^- \cdot \text{SO}_3^{2-}][\text{M}] = 0$$

$$[\text{OBr}^- \cdot \text{SO}_3^{2-}] = \frac{k_1[\text{OBr}^-][\text{SO}_3^{2-}]}{k_{-1} + k_{12}[\text{M}]} \quad (22-6)$$

$$v_{1\text{OBr}^- + \text{SO}_3^{2-}, \text{cat}} = \frac{d[\text{SO}_4^{2-}]}{dt} = \frac{k_{20} \times k_{19}}{k_{-19} + k_{20}} \times \frac{1}{k_{-8} + k_{19}[\text{M}]} \times \frac{k_{13} \times k_{12}}{k_{-12} + k_{13}} \\ \times \frac{k_1}{k_{-1} + k_{12}[\text{M}]} [\text{OBr}^-][\text{SO}_3^{2-}][\text{M}][\text{M}] \quad (22-7)$$

The pseudo-unimolecular catalyzed S(IV) oxidation rate through Pathway 1 (OBr<sup>-</sup> + SO<sub>3</sub><sup>2-</sup>) can be written as

$$v_{1\text{OBr}^- + \text{SO}_3^{2-}, \text{cat-S(IV)}} = \frac{k_{20} \times k_{19}}{k_{-19} + k_{20}} \times \frac{1}{k_{-8} + k_{19}[\text{M}]} \times \frac{k_{13} \times k_{12}}{k_{-12} + k_{13}} \\ \times \frac{k_1}{k_{-1} + k_{12}[\text{M}]} [\text{OBr}^-][\text{M}][\text{M}] \quad (22-8)$$

where  $k_{19}/k_{-19}$  symbolize the forward/reverse rate coefficients for the reaction 19 and  $k_{20}$  is the unimolecular rate constant for the catalyzed reaction 20. In addition, [M] is the concentration of catalyst M.

### 3.3.2 The reaction rate via Pathway 2(OBr<sup>-</sup>+SO<sub>3</sub><sup>2-</sup>)

The detailed formation process of sulfate from OBr<sup>-</sup> and SO<sub>3</sub><sup>2-</sup> through Pathway 2(OBr<sup>-</sup> + SO<sub>3</sub><sup>2-</sup>) is described by the following reaction equations:

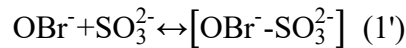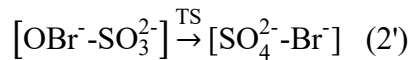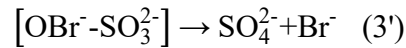

Applying the steady-state approximation to the pre-reactive complex and assuming that the complex is in equilibrium with the reactant, we obtain the following expressions for the uncatalyzed formation reaction rate ( $v_{2\text{OBr}^- + \text{SO}_3^{2-}, \text{un}}$ ) of (where  $k_n$  is the rate constant for reaction n in the scheme given above):

$$v_{2\text{OBr}^- + \text{SO}_3^{2-}, \text{un}} = \frac{d[\text{SO}_4^{2-}]}{dt} = k_2' [\text{OBr}^- \cdot \text{SO}_3^{2-}] \quad (4')$$



$$k_{1'}[\text{OBr}^-][\text{SO}_3^{2-}] - k_{-1'}[\text{OBr}^-][\text{SO}_3^{2-}] - k_2[\text{OBr}^- - \text{SO}_3^{2-}] = 0$$

$$[\text{OBr}^- - \text{SO}_3^{2-}] = \frac{k_{1'}[\text{OBr}^-][\text{SO}_3^{2-}]}{k_{-1'} + k_2} \quad (4'-1)$$

$$v_{2\text{OBr}^- + \text{SO}_3^{2-}, \text{un}} = \frac{d[\text{SO}_4^{2-}]}{dt} = \frac{k_{1'} \times k_2'}{k_{-1'} + k_2'} [\text{OBr}^-][\text{SO}_3^{2-}] \quad (4'-2)$$

The pseudo-unimolecular uncatalyzed S(IV) oxidation rates through Pathway 2(OBr<sup>-</sup> + SO<sub>3</sub><sup>2-</sup>) can be written as

$$v_{2\text{OBr}^- + \text{SO}_3^{2-} - \text{S(IV)}} = \frac{k_{1'} \times k_2'}{k_{-1'} + k_2'} [\text{OBr}^-] \quad (4'-3)$$

where  $k_{1'}/k_{-1'}$  symbolizes the forward/reverse rate coefficients for the reaction 1' and  $k_2'$  is the unimolecular rate constant for the uncatalyzed reaction 2'.

The detailed catalyzed formation process of sulfate from OBr<sup>-</sup> and SO<sub>3</sub><sup>2-</sup> through Pathway 2(OBr<sup>-</sup> + SO<sub>3</sub><sup>2-</sup>) is described by the following reaction equations:

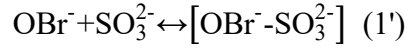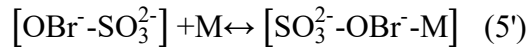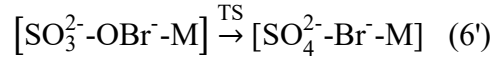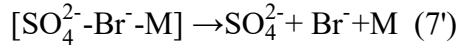

Applying the steady-state approximation to the pre-reactive complex and assuming that the complex is in equilibrium with the reactant, we obtain the following expressions for the catalyzed formation reaction rate ( $v_{2\text{OBr}^- + \text{SO}_3^{2-}, \text{cat}}$ ) of sulfate (where  $k_n$  is the rate constant for reaction n in the scheme given above):

$$v_{2\text{OBr}^- + \text{SO}_3^{2-}, \text{cat}} = \frac{d[\text{SO}_4^{2-}]}{dt} = k_6' [\text{SO}_3^{2-} - \text{OBr}^- - \text{M}] \quad (8')$$

$$k_5' [\text{OBr}^- - \text{SO}_3^{2-}] [\text{M}] - k_{-5}' [\text{SO}_3^{2-} - \text{OBr}^- - \text{M}] - k_6' [\text{SO}_3^{2-} - \text{OBr}^- - \text{M}] = 0$$

$$[\text{SO}_3^{2-} - \text{OBr}^- - \text{M}] = \frac{k_5' [\text{OBr}^- - \text{SO}_3^{2-}] [\text{M}]}{k_{-5}' + k_6'} \quad (8'-1)$$

$$k_{1'} [\text{OBr}^-] [\text{SO}_3^{2-}] - k_{-1'} [\text{OBr}^- - \text{SO}_3^{2-}] - k_5' [\text{OBr}^- - \text{SO}_3^{2-}] [\text{M}] = 0$$

$$[\text{OBr}^- - \text{SO}_3^{2-}] = \frac{k_{1'} [\text{OBr}^-] [\text{SO}_3^{2-}]}{k_{-1'} + k_5' [\text{M}]} \quad (8'-2)$$

$$v_{2\text{OBr}^- + \text{SO}_3^{2-}, \text{cat}} = \frac{d[\text{SO}_4^{2-}]}{dt} = \frac{k_6' \times k_5'}{k_{-5'} + k_6'} \times \frac{k_1'}{k_{-1'} + k_5'[\text{M}]} \times [\text{OBr}^-][\text{SO}_3^{2-}][\text{M}] \quad (8'-3)$$

The pseudo-unimolecular catalyzed S(IV) oxidation rate through Pathway 1(OBr<sup>-</sup> + SO<sub>3</sub><sup>2-</sup>) can be written as

$$v_{2\text{OBr}^- + \text{SO}_3^{2-}, \text{cat-S(IV)}} = \frac{k_6' \times k_5'}{k_{-5'} + k_6'} \times \frac{k_1'}{k_{-1'} + k_5'[\text{M}]} \times [\text{OBr}^-][\text{M}] \quad (8'-4)$$

where  $k_5'/k_{-5'}$  symbolizes the forward/reverse rate coefficients for the reaction 5' and  $k_6'$  is the unimolecular rate constant for the catalyzed reaction 6'.

### 3.3.3 S(IV) oxidation rate, related reaction rate constants and S(IV) lifetimes through Pathway 1(OBr<sup>-</sup> + SO<sub>3</sub><sup>2-</sup>) and Pathway 2(OBr<sup>-</sup> + SO<sub>3</sub><sup>2-</sup>)

Table S8. Calculated forward/reverse rate coefficients ( $k_1/k_{-1}$ ,  $k_4/k_{-4}$ ,  $k_8/k_{-8}$ ,  $k_{12}/k_{-12}$ ,  $k_{15}/k_{-15}$ ,  $k_{19}/k_{-19}$ ), and the unimolecular rate constants ( $k_2$ ,  $k_5$ ,  $k_9$ ,  $k_{13}$ ,  $k_{16}$ ,  $k_{20}$ ) for the sulfate formation between OBr<sup>-</sup> and SO<sub>3</sub><sup>2-</sup> through Pathway 1(OBr<sup>-</sup> + SO<sub>3</sub><sup>2-</sup>).

| Catalyst                                   | Rate constants |                                                  | Rate constants |                                      |
|--------------------------------------------|----------------|--------------------------------------------------|----------------|--------------------------------------|
| Without catalyst                           | $k_1$          | $3.23 \times 10^9 \text{ M}^{-1} \text{ s}^{-1}$ | $k_{-1}$       | $4.53 \times 10^9 \text{ s}^{-1}$    |
|                                            | $k_2$          | $1.88 \times 10^{-3} \text{ s}^{-1}$             |                |                                      |
|                                            | $k_4$          | $7.81 \times 10^9 \text{ M}^{-1} \text{ s}^{-1}$ | $k_{-4}$       | $5.57 \times 10^9 \text{ s}^{-1}$    |
|                                            | $k_5$          | $8.05 \times 10^{-28}$                           |                |                                      |
|                                            | $k_8$          | $7.69 \times 10^9 \text{ M}^{-1} \text{ s}^{-1}$ | $k_{-8}$       | $1.61 \times 10^{11} \text{ s}^{-1}$ |
|                                            | $k_9$          | $1.03 \text{ s}^{-1}$                            |                |                                      |
| (H <sub>2</sub> O-catalyzed)               | $k_{12}$       | $8.00 \times 10^9 \text{ M}^{-1} \text{ s}^{-1}$ | $k_{-12}$      | $4.53 \times 10^8 \text{ s}^{-1}$    |
|                                            | $k_{13}$       | $3.67 \times 10^2 \text{ s}^{-1}$                |                |                                      |
|                                            | $k_{15}$       | $7.81 \times 10^9 \text{ M}^{-1} \text{ s}^{-1}$ | $k_{-15}$      | $1.38 \times 10^{11} \text{ s}^{-1}$ |
|                                            | $k_{16}$       | $2.27 \times 10^{-8}$                            |                |                                      |
|                                            | $k_{19}$       | $7.98 \times 10^9 \text{ M}^{-1} \text{ s}^{-1}$ | $k_{-19}$      | $5.03 \times 10^7 \text{ s}^{-1}$    |
|                                            | $k_{20}$       | $4.70 \text{ s}^{-1}$                            |                |                                      |
| (HSO <sub>4</sub> <sup>-</sup> -catalyzed) | $k_{12}$       | $3.23 \times 10^9 \text{ M}^{-1} \text{ s}^{-1}$ | $k_{-12}$      | $4.53 \times 10^9 \text{ s}^{-1}$    |
|                                            | $k_{13}$       | $3.25 \times 10^9 \text{ s}^{-1}$                |                |                                      |
|                                            | $k_{15}$       | $3.23 \times 10^9 \text{ M}^{-1} \text{ s}^{-1}$ | $k_{-15}$      | $1.64 \times 10^9 \text{ s}^{-1}$    |
|                                            | $k_{16}$       | $7.39 \times 10^{-8}$                            |                |                                      |
|                                            | $k_{19}$       | $3.25 \times 10^9 \text{ M}^{-1} \text{ s}^{-1}$ | $k_{-19}$      | $2.04 \times 10^{-4} \text{ s}^{-1}$ |
|                                            | $k_{20}$       | $1.25 \times 10^{-4} \text{ s}^{-1}$             |                |                                      |

Table S9. Calculated forward/reverse rate coefficients ( $k_1'/k_{-1}'$ ,  $k_5'/k_{-5}'$ ), and the unimolecular rate constants ( $k_2'$ ,  $k_6'$ ) for the sulfate formation between OBr<sup>-</sup> and SO<sub>3</sub><sup>2-</sup>

through Pathway 2( $\text{OBr}^- + \text{SO}_3^{2-}$ ).

| Rate constant                              | Rate constants |                                                  | Rate constants |                                      |
|--------------------------------------------|----------------|--------------------------------------------------|----------------|--------------------------------------|
| (H <sub>2</sub> O-catalyzed)               | $k_1$          | $3.23 \times 10^9 \text{ M}^{-1} \text{ s}^{-1}$ | $k_{-1}$       | $6.75 \times 10^{10} \text{ s}^{-1}$ |
|                                            | $k_2$          | $3.32 \times 10^{-5} \text{ s}^{-1}$             |                |                                      |
|                                            | $k_5$          | $8.03 \times 10^9 \text{ M}^{-1} \text{ s}^{-1}$ | $k_{-5}$       | $3.19 \times 10^5 \text{ s}^{-1}$    |
| (HSO <sub>4</sub> <sup>-</sup> -catalyzed) | $k_6$          | $2.54 \times 10^{-4}$                            |                |                                      |
|                                            | $k_5$          | $3.25 \times 10^9 \text{ M}^{-1} \text{ s}^{-1}$ | $k_{-5}$       | $2.87 \times 10^{-4} \text{ s}^{-1}$ |
|                                            | $k_6$          | $2.46 \times 10^2 \text{ s}^{-1}$                |                |                                      |

Table S10. Calculated overall rate constant, effective rate constant, S(IV) oxidation rate and the S(IV) lifetimes for Pathway 1( $\text{OBr}^- + \text{SO}_3^{2-}$ ) and Pathway 2( $\text{OBr}^- + \text{SO}_3^{2-}$ ) from  $\text{SO}_3^{2-}$  and  $\text{OBr}^-$  respectively, assuming  $[\text{OBr}^-] = 7.42 \times 10^{-7} \text{ M}$  (corresponding to a Henry's law equilibrium with a gas phase HOBr mixing ratio of 0.31 ppbv at pH=9), and  $[\text{H}_2\text{O}] = 55.56 \text{ M}$  (corresponding to the known bulk concentration of H<sub>2</sub>O).

| Rate constants                                                  | Catalysts                                             | Overall rate constant $\text{M}^{-2} \text{s}^{-1}$ | Effective rate constant <sup>d</sup> ( $\text{M}^{-1} \text{s}^{-1}$ ) | S(IV) oxidation rate ( $\text{s}^{-1}$ ) | S(IV) lifetime (s)    |
|-----------------------------------------------------------------|-------------------------------------------------------|-----------------------------------------------------|------------------------------------------------------------------------|------------------------------------------|-----------------------|
| Pathway 1 <sup>a</sup><br>( $\text{OBr}^- + \text{SO}_3^{2-}$ ) | Without catalyst                                      | $1.94 \times 10^{-40}$                              | $1.94 \times 10^{-40}$                                                 | $1.44 \times 10^{-46}$                   | $6.96 \times 10^{45}$ |
|                                                                 | H <sub>2</sub> O-catalyzed                            | $1.36 \times 10^{-19}$                              | $4.21 \times 10^{-16}$                                                 | $3.12 \times 10^{-22}$                   | $3.20 \times 10^{21}$ |
|                                                                 | HSO <sub>4</sub> <sup>-</sup> -catalyzed <sup>c</sup> | $2.51 \times 10^{-8}$                               | $2.51 \times 10^{-26}$                                                 | $1.86 \times 10^{-32}$                   | $5.37 \times 10^{31}$ |
| Pathway 1 <sup>b</sup><br>( $\text{OBr}^- + \text{SO}_3^{2-}$ ) | Without catalyst                                      | $6.80 \times 10^{-15}$                              | $6.80 \times 10^{-15}$                                                 | $5.05 \times 10^{-21}$                   | $1.98 \times 10^{20}$ |
|                                                                 | H <sub>2</sub> O-catalyzed                            | $4.44 \times 10^{-8}$                               | $1.37 \times 10^{-4}$                                                  | $1.02 \times 10^{-10}$                   | $9.83 \times 10^9$    |
|                                                                 | HSO <sub>4</sub> <sup>-</sup> -catalyzed <sup>c</sup> | $1.76 \times 10^7$                                  | $1.76 \times 10^{-11}$                                                 | $1.31 \times 10^{-17}$                   | $7.64 \times 10^{16}$ |
| Pathway 2<br>( $\text{OBr}^- + \text{SO}_3^{2-}$ )              | Without catalyst                                      | $1.59 \times 10^{-6}$                               | $1.59 \times 10^{-6}$                                                  | $1.18 \times 10^{-12}$                   | $8.49 \times 10^{11}$ |
|                                                                 | H <sub>2</sub> O-catalyzed                            | $4.01 \times 10^{-2}$                               | 2.23                                                                   | $1.65 \times 10^{-6}$                    | $6.04 \times 10^5$    |
|                                                                 | HSO <sub>4</sub> <sup>-</sup> -catalyzed <sup>c</sup> | $1.56 \times 10^8$                                  | $1.56 \times 10^{-1}$                                                  | $1.15 \times 10^{-7}$                    | $8.66 \times 10^6$    |

<sup>a</sup> The second step of Pathway 1 ( $\text{OBr}^- + \text{SO}_3^{2-}$ ) leading to sulfate formation through the hydrolysis reaction.

<sup>b</sup> The second step of Pathway 1 ( $\text{OBr}^- + \text{SO}_3^{2-}$ ) leading to sulfate formation through the reaction of  $\text{BrSO}_3^-$  intermediate with  $\text{OH}^-$ .

<sup>c</sup> Assuming a general concentration of  $\text{H}^+$  act as the possible higher limit for the concentration of  $\text{HSO}_4^-$  in cloud water.

<sup>d</sup> Effective rate constant = Overall rate constant  $\times [\text{M}]$ , where  $[\text{M}]$  is the concentration of catalyst M.

## Section 4. Cartesian coordinates of the structures.

### 4.1 Cartesian coordinates of the structures involving in the reaction of HOBr with HOSO<sub>2</sub><sup>-</sup>.

Table S11. Coordinates of HOBr. Units are in angstrom.

| atom | X         | Y         | Z        |
|------|-----------|-----------|----------|
| O    | 0.021200  | 1.437606  | 0.000000 |
| H    | -0.911587 | 1.678685  | 0.000000 |
| Br   | 0.021200  | -0.376558 | 0.000000 |

Table S12. Coordinates of HOSO<sub>2</sub><sup>-</sup>. Units are in angstrom.

| atom | X         | Y         | Z         |
|------|-----------|-----------|-----------|
| S    | 0.174133  | 0.000070  | -0.381367 |
| O    | -1.480647 | -0.001124 | 0.046825  |
| H    | -1.462594 | -0.000264 | 1.013624  |
| O    | 0.658589  | -1.218452 | 0.294668  |
| O    | 0.656617  | 1.219468  | 0.294537  |

Table S13. Coordinates of BrSO<sub>3</sub><sup>-</sup>. Units are in angstrom.

| atom | X         | Y         | Z         |
|------|-----------|-----------|-----------|
| S    | -1.018881 | -0.000009 | 0.000016  |
| O    | -1.298949 | -1.256781 | 0.633168  |
| O    | -1.298964 | 1.176750  | 0.771791  |
| O    | -1.299024 | 0.080039  | -1.404952 |
| Br   | 1.356503  | 0.000003  | -0.000009 |

Table S14. Coordinates of BrSO<sub>3</sub>H. Units are in angstrom.

| atom | X         | Y         | Z         |
|------|-----------|-----------|-----------|
| S    | -0.880751 | 0.120799  | 0.069210  |
| O    | -1.289144 | -1.073702 | -0.866719 |
| H    | -1.289927 | -1.899639 | -0.361576 |
| O    | -1.269048 | -0.181821 | 1.397289  |
| O    | -1.259093 | 1.303032  | -0.598161 |
| Br   | 1.312006  | -0.011806 | -0.005859 |

Table S15. Coordinates of cis-H<sub>2</sub>SO<sub>4</sub>. Units are in angstrom.

| atom | X         | Y        | Z        |
|------|-----------|----------|----------|
| S    | 0.000000  | 0.091216 | 0.120238 |
| O    | -0.000020 | 1.494832 | 0.195960 |

|   |           |           |           |
|---|-----------|-----------|-----------|
| O | 0.000013  | -0.758497 | 1.259994  |
| O | -1.223808 | -0.312199 | -0.783942 |
| H | -1.556128 | -1.177623 | -0.514162 |
| O | 1.223810  | -0.312168 | -0.783949 |
| H | 1.556168  | -1.177575 | -0.514159 |

Table S16. Coordinates of trans-H<sub>2</sub>SO<sub>4</sub>. Units are in angstrom.

| atom | X         | Y         | Z         |
|------|-----------|-----------|-----------|
| S    | -0.000002 | 0.000001  | -0.153840 |
| O    | 0.641015  | -1.068244 | -0.819725 |
| O    | -0.641020 | 1.068270  | -0.819690 |
| O    | 1.029516  | 0.662937  | 0.836058  |
| O    | -1.029509 | -0.662963 | 0.836045  |
| H    | 1.691785  | 0.010654  | 1.099951  |
| H    | -1.691765 | -0.010681 | 1.099974  |

Table S17. Coordinates of SO<sub>4</sub><sup>2-</sup>. Units are in angstrom.

| atom | X         | Y         | Z         |
|------|-----------|-----------|-----------|
| S    | -0.000002 | 0.000017  | -0.000050 |
| O    | 0.374677  | 0.239450  | 1.421658  |
| O    | 1.227987  | -0.274813 | -0.797412 |
| O    | -0.685196 | 1.206218  | -0.542828 |
| O    | -0.917463 | -1.170888 | -0.081318 |

Table S18. Coordinates of H<sub>2</sub>O. Units are in angstrom.

| atom | X         | Y         | Z         |
|------|-----------|-----------|-----------|
| H    | -0.000000 | 0.000000  | 0.116661  |
| O    | 0.000000  | 0.760848  | -0.466644 |
| O    | -0.000000 | -0.760848 | -0.466644 |

Table S19. Coordinates of OH<sup>-</sup>. Units are in angstrom.

| atom | X         | Y        | Z         |
|------|-----------|----------|-----------|
| O    | -0.000000 | 0.000000 | 0.106625  |
| H    | 0.000000  | 0.000000 | -0.853002 |

Table S20. Coordinates of HSO<sub>4</sub><sup>-</sup>. Units are in angstrom.

| atom | X         | Y         | Z         |
|------|-----------|-----------|-----------|
| S    | -0.142029 | -0.029869 | -0.000006 |
| O    | -0.900566 | 1.193776  | -0.000107 |
| O    | -0.232877 | -0.817287 | -1.211881 |
| O    | -0.233038 | -0.817186 | 1.211922  |

|   |          |           |          |
|---|----------|-----------|----------|
| O | 1.405583 | 0.532161  | 0.000068 |
| H | 1.959652 | -0.253800 | 0.000082 |

Table S21. Coordinates of reactant complex ( $R_{c1}$ ). Units are in angstrom.

| atom | X         | Y         | Z         |
|------|-----------|-----------|-----------|
| S    | 1.427633  | -0.133204 | 0.040985  |
| O    | 1.984175  | 1.296588  | -0.572656 |
| H    | 1.762363  | 2.010589  | 0.042141  |
| O    | 2.052072  | -0.212097 | 1.369052  |
| O    | 2.014100  | -1.067179 | -0.926653 |
| O    | -3.151990 | 0.106632  | 0.025565  |
| H    | -3.440872 | -0.543055 | -0.625659 |
| Br   | -1.267156 | -0.009366 | 0.021866  |

Table S22. Coordinates of transition state ( $P_{c2}$ ). Units are in angstrom.

| atom | X         | Y         | Z         |
|------|-----------|-----------|-----------|
| O    | -1.144381 | -1.843517 | 0.007509  |
| H    | -1.347257 | -1.861750 | 0.947528  |
| Br   | 1.441060  | -0.591378 | -0.024336 |
| S    | 3.420095  | 0.327536  | -0.019076 |
| O    | 3.107250  | 1.842213  | 0.156205  |
| H    | 2.966684  | 2.090686  | 1.088336  |
| O    | 4.123158  | -0.156613 | 1.120129  |
| O    | 3.970510  | 0.189525  | -1.321330 |
| S    | -3.870488 | 0.339355  | -0.000272 |
| O    | -4.138490 | 1.790947  | -0.057268 |
| O    | -5.113813 | -0.415618 | -0.262991 |
| O    | -3.334093 | -0.024582 | 1.330302  |
| O    | -2.856848 | -0.012079 | -1.037890 |
| H    | -1.756586 | -1.163181 | -0.351873 |

Table S23. Coordinates of product complex ( $R_{c3}$ ). Units are in angstrom.

| atom | X         | Y         | Z         |
|------|-----------|-----------|-----------|
| S    | 0.342745  | 0.690269  | 0.003442  |
| O    | 0.941680  | 0.406782  | 1.282483  |
| O    | 1.088154  | 0.183042  | -1.128057 |
| O    | -0.168271 | 2.024963  | -0.160272 |
| O    | 3.413365  | -1.184098 | -0.062709 |
| H    | 2.642865  | -0.745384 | -0.450686 |
| H    | 3.355970  | -0.974361 | 0.874341  |
| Br   | -1.533776 | -0.593430 | 0.001992  |

Table S24. Coordinates of reactant complex ( $TS_3$ ). Units are in angstrom.

| atom | X         | Y         | Z         |
|------|-----------|-----------|-----------|
| S    | 0.716046  | -0.160474 | 0.024768  |
| O    | 0.828803  | -0.877085 | -1.212304 |
| O    | 0.834227  | 1.389566  | -0.020218 |
| O    | 0.798791  | -0.790021 | 1.307656  |
| O    | 2.762989  | 0.191429  | 0.053070  |
| H    | 1.890476  | 1.354598  | -0.027653 |
| H    | 3.085191  | -0.041956 | -0.822830 |
| Br   | -1.663740 | 0.055538  | -0.016327 |

Table S25. Coordinates of transition state ( $P_{c3}$ ). Units are in angstrom.

| atom | X         | Y         | Z         |
|------|-----------|-----------|-----------|
| S    | 1.566238  | 0.110840  | 0.041666  |
| O    | 1.435473  | 0.195213  | 1.462515  |
| O    | 0.529932  | -0.850525 | -0.536860 |
| O    | 1.611906  | 1.328763  | -0.698770 |
| O    | 2.891271  | -0.637893 | -0.313916 |
| H    | -0.466335 | -0.543199 | -0.330771 |
| H    | 3.040588  | -1.409501 | 0.258348  |
| Br   | -2.268078 | -0.003006 | 0.002915  |

Table S26. Coordinates of product complex ( $R_{c4}$ ). Units are in angstrom.

| atom | X         | Y         | Z         |
|------|-----------|-----------|-----------|
| S    | -0.007458 | -0.439482 | 0.316425  |
| O    | 0.581178  | 0.674236  | 1.025632  |
| O    | 0.615932  | -0.738344 | -0.951016 |
| O    | -0.312041 | -1.582439 | 1.134257  |
| O    | 3.133176  | 1.680571  | 0.232594  |
| H    | 3.061303  | 2.250234  | -0.539509 |
| H    | 2.220600  | 1.434724  | 0.449935  |
| O    | 3.532374  | -0.981495 | -0.673097 |
| H    | 2.599736  | -1.130289 | -0.872705 |
| H    | 3.545202  | -0.057229 | -0.374920 |
| Br   | -2.048927 | 0.346115  | -0.282073 |

Table S27. Coordinates of reactant complex ( $TS_4$ ). Units are in angstrom.

| atom | X        | Y         | Z         |
|------|----------|-----------|-----------|
| S    | 0.549142 | 0.449643  | -0.010165 |
| O    | 0.723513 | -0.368873 | -1.157271 |
| O    | 0.676697 | -0.116827 | 1.286406  |
| O    | 0.163766 | 1.807765  | -0.153016 |
| O    | 3.575070 | -1.535051 | -0.013867 |

|    |           |           |           |
|----|-----------|-----------|-----------|
| H  | 3.332726  | -1.898494 | 0.845035  |
| H  | 2.970702  | -1.956567 | -0.635498 |
| O  | 2.677961  | 0.990897  | -0.088258 |
| H  | 2.917195  | 1.471972  | 0.713745  |
| H  | 3.114746  | 0.107844  | -0.019547 |
| Br | -2.390220 | -0.318353 | 0.007627  |

Table S28. Coordinates of transition state ( $P_{c4}$ ). Units are in angstrom.

| atom | X         | Y         | Z         |
|------|-----------|-----------|-----------|
| S    | -1.615124 | -0.594010 | -0.012610 |
| O    | -1.237412 | 0.699913  | -0.521949 |
| O    | -1.288087 | -0.833345 | 1.371653  |
| O    | -1.332044 | -1.702429 | -0.889505 |
| O    | -4.285826 | 1.834307  | 0.062815  |
| H    | -3.659131 | 2.469530  | 0.449969  |
| H    | -4.489010 | 2.119938  | -0.843837 |
| O    | -3.255946 | -0.460310 | -0.031933 |
| H    | -3.675133 | -1.138295 | 0.519892  |
| H    | -3.852918 | 0.894894  | 0.039745  |
| Br   | 3.791791  | 0.252943  | 0.003067  |

Table S29. Coordinates of product complex ( $R_{c5}$ ). Units are in angstrom.

| atom | X         | Y         | Z         |
|------|-----------|-----------|-----------|
| S    | -1.663798 | -0.064638 | 0.000002  |
| O    | -2.830060 | 1.106089  | -0.000001 |
| H    | -3.702334 | 0.678324  | -0.000009 |
| O    | -1.969735 | -0.850822 | -1.214745 |
| O    | -1.969751 | -0.850827 | 1.214738  |
| O    | 1.230612  | 1.376371  | 0.000001  |
| H    | 0.291344  | 1.101905  | 0.000006  |
| Br   | 2.124092  | -0.199786 | 0.000001  |

Table S30. Coordinates of reactant complex ( $TS_5$ ). Units are in angstrom.

| atom | X         | Y         | Z         |
|------|-----------|-----------|-----------|
| S    | 1.858352  | -0.165624 | 0.008480  |
| O    | 1.791103  | 1.453275  | -0.086653 |
| H    | 2.694794  | 1.811313  | -0.068148 |
| O    | 2.584834  | -0.441692 | 1.252171  |
| O    | 2.593166  | -0.589871 | -1.187213 |
| O    | -0.311657 | -0.186245 | 0.008596  |
| H    | -0.342084 | -1.155452 | 0.010163  |
| Br   | -2.438454 | 0.003154  | 0.000774  |



Table S31. Coordinates of transition state (P<sub>c5</sub>). Units are in angstrom.

| atom | X         | Y         | Z         |
|------|-----------|-----------|-----------|
| S    | -1.646423 | -0.066252 | 0.071228  |
| O    | -1.474783 | 1.280283  | -0.719095 |
| H    | -1.870957 | 2.026630  | -0.240316 |
| O    | -2.892207 | -0.663925 | -0.287792 |
| O    | -1.416258 | 0.195703  | 1.457212  |
| O    | -0.535877 | -0.889315 | -0.553785 |
| H    | 0.446609  | -0.544225 | -0.324029 |
| Br   | 2.237717  | 0.005590  | 0.007211  |

Table S32. Coordinates of product complex (R<sub>c6</sub>). Units are in angstrom.

| atom | X         | Y         | Z         |
|------|-----------|-----------|-----------|
| S    | 1.689482  | -0.562651 | -0.043972 |
| O    | 2.509761  | 0.820847  | -0.413508 |
| H    | 1.919010  | 1.569443  | -0.179470 |
| O    | 1.691389  | -0.578780 | 1.435606  |
| O    | 2.618258  | -1.568023 | -0.596455 |
| O    | -1.127050 | 0.566290  | -0.976709 |
| H    | -0.270441 | 0.094833  | -0.874743 |
| O    | 0.553102  | 2.671870  | 0.214998  |
| H    | 0.441513  | 2.710033  | 1.170763  |
| H    | -0.228160 | 2.205248  | -0.112441 |
| Br   | -2.253066 | -0.367850 | 0.096799  |

Table S33. Coordinates of reactant complex (TS<sub>6</sub>). Units are in angstrom.

| atom | X         | Y         | Z         |
|------|-----------|-----------|-----------|
| S    | 1.922238  | -0.395002 | 0.056415  |
| O    | 1.898289  | 0.923038  | -0.870401 |
| H    | 1.156423  | 1.510337  | -0.566685 |
| O    | 2.373114  | 0.061716  | 1.378490  |
| O    | 2.909066  | -1.230674 | -0.637011 |
| O    | -0.320428 | -0.547812 | -0.001948 |
| H    | -0.303256 | -1.246435 | 0.670306  |
| O    | -0.186343 | 2.383894  | -0.058873 |
| H    | -0.002392 | 2.865784  | 0.754916  |
| H    | -0.793121 | 1.675779  | 0.198362  |
| Br   | -2.405801 | -0.320192 | -0.012617 |

Table S34. Coordinates of transition state (P<sub>c6</sub>). Units are in angstrom.

| atom | X | Y | Z |
|------|---|---|---|
|------|---|---|---|

|    |           |           |           |
|----|-----------|-----------|-----------|
| S  | 1.728078  | -0.216876 | 0.065513  |
| O  | 1.430815  | 0.949666  | -0.879776 |
| H  | 0.648574  | 1.572122  | -0.528750 |
| O  | 1.471728  | 0.189932  | 1.415420  |
| O  | 3.022655  | -0.726752 | -0.252612 |
| O  | 0.724141  | -1.323632 | -0.337102 |
| H  | -0.241275 | -1.031739 | -0.189258 |
| O  | -0.460709 | 2.343385  | -0.096662 |
| H  | -0.277743 | 2.756432  | 0.756309  |
| H  | -1.143845 | 1.656424  | 0.064091  |
| Br | -2.175543 | -0.369829 | 0.001579  |

#### 4.2 Cartesian coordinates of the structures involving in the reaction of HOBr with $\text{SO}_3^{2-}$ .

Table S35. Coordinates of  $\text{SO}_3^{2-}$ . Units are in angstrom.

| atom | X         | Y         | Z         |
|------|-----------|-----------|-----------|
| S    | -0.000055 | -0.000023 | 0.332061  |
| O    | -0.171848 | 1.409296  | -0.221366 |
| O    | -1.134796 | -0.853445 | -0.221340 |
| O    | 1.306754  | -0.555805 | -0.221415 |

Table S36. Coordinates of monomer ( $\text{M}_7$ ). Units are in angstrom.

| atom | X           | Y           | Z           |
|------|-------------|-------------|-------------|
| S    | -1.05978900 | 0.00994400  | -0.02952400 |
| O    | -1.74023800 | 1.37383200  | 0.08497500  |
| O    | -1.44002600 | -0.74724400 | 1.24208400  |
| O    | -1.77860300 | -0.71314900 | -1.16886200 |
| O    | 3.28879445  | 0.93178316  | -1.76698883 |
| H    | 3.81448122  | 1.05680239  | -0.96306569 |
| Br   | 1.60237850  | 0.67795094  | -1.19116728 |

Table S37. Coordinates of product complex ( $\text{P}_{c7}$ ). Units are in angstrom.

| atom | X         | Y         | Z         |
|------|-----------|-----------|-----------|
| S    | -1.517619 | -0.063942 | 0.004340  |
| O    | -1.798264 | -0.498979 | 1.348972  |
| O    | -1.763046 | -1.047084 | -1.019481 |
| O    | -1.962285 | 1.269939  | -0.310948 |
| O    | 4.757766  | -0.149211 | 0.034197  |
| H    | 3.866296  | -0.399166 | -0.218029 |
| Br   | 0.758350  | 0.137855  | -0.007809 |

Table S38. Coordinates of reactant complex ( $R_{c8}$ ). Units are in angstrom.

| Atom | X         | Y         | Z         |
|------|-----------|-----------|-----------|
| S    | 0.478604  | -0.144418 | 0.000202  |
| O    | 0.960060  | 1.211467  | -0.095560 |
| O    | 0.730443  | -0.792814 | 1.261157  |
| O    | 0.712723  | -0.957736 | -1.165307 |
| O    | 4.076786  | 0.228760  | 0.000537  |
| H    | 3.194267  | 0.605716  | -0.005628 |
| Br   | -1.791200 | 0.119645  | -0.000121 |

Table S39. Coordinates of transition state ( $TS_8$ ). Units are in angstrom.

| Atom | X         | Y         | Z         |
|------|-----------|-----------|-----------|
| S    | -0.805044 | 0.020026  | 0.001853  |
| O    | -0.908701 | -0.770179 | -1.185880 |
| O    | -0.904517 | -0.617157 | 1.278226  |
| O    | -0.889124 | 1.444709  | -0.086122 |
| O    | -3.236596 | 0.066687  | -0.004440 |
| H    | -3.354624 | -0.886284 | -0.000933 |
| Br   | 1.821338  | -0.012189 | -0.001228 |

Table S40. Coordinates of product complex ( $P_{c8}$ ). Units are in angstrom.

| Atom | X         | Y         | Z         |
|------|-----------|-----------|-----------|
| S    | 2.214578  | -0.003426 | 0.002085  |
| O    | 1.937760  | -0.718536 | 1.232736  |
| O    | 1.919999  | -0.781246 | -1.185951 |
| O    | 1.701369  | 1.347694  | -0.028589 |
| O    | 3.800961  | 0.241372  | -0.017181 |
| H    | 4.266137  | -0.607657 | -0.025444 |
| Br   | -3.273717 | -0.001480 | -0.000458 |

Table S41. Coordinates of product complex ( $R_{c9}$ ). Units are in angstrom.

| Atom | X        | Y         | Z         |
|------|----------|-----------|-----------|
| S    | 0.099989 | 0.193893  | -0.122658 |
| O    | 0.178015 | 1.484651  | -0.756089 |
| O    | 0.576831 | 0.149098  | 1.235996  |
| O    | 0.509025 | -0.916889 | -0.948145 |
| O    | 3.565197 | 1.050631  | 0.152463  |
| H    | 2.708483 | 1.355295  | 0.461188  |
| O    | 3.298822 | -1.455676 | 0.067919  |
| H    | 3.399915 | -0.419514 | 0.104905  |
| H    | 2.393865 | -1.584610 | -0.234120 |

|    |           |           |          |
|----|-----------|-----------|----------|
| Br | -2.146435 | -0.141371 | 0.103240 |
|----|-----------|-----------|----------|

Table S42. Coordinates of product complex (TS<sub>9</sub>). Units are in angstrom.

| Atom | X         | Y         | Z         |
|------|-----------|-----------|-----------|
| S    | -0.416334 | 0.372256  | 0.013357  |
| O    | -0.141088 | 1.767413  | -0.128730 |
| O    | -0.708500 | -0.408842 | -1.149640 |
| O    | -0.630845 | -0.186859 | 1.310827  |
| O    | -2.712679 | 0.948934  | 0.084185  |
| H    | -2.823758 | 1.306087  | -0.800649 |
| O    | -3.356177 | -1.496017 | 0.014534  |
| H    | -3.094648 | -0.496893 | 0.022570  |
| H    | -2.547212 | -1.949180 | -0.237139 |
| Br   | 2.157751  | -0.280375 | -0.007083 |

Table S43. Coordinates of product complex (P<sub>c9</sub>). Units are in angstrom.

| Atom | X         | Y         | Z         |
|------|-----------|-----------|-----------|
| S    | 1.803550  | -0.621420 | 0.029320  |
| O    | 1.183605  | -1.817192 | -0.498729 |
| O    | 1.519515  | 0.562813  | -0.770030 |
| O    | 1.627225  | -0.423605 | 1.448062  |
| O    | 3.386406  | -0.844040 | -0.087539 |
| H    | 3.632852  | -1.003432 | -1.010836 |
| O    | 3.358252  | 2.593792  | -0.006868 |
| H    | 4.139951  | 2.093188  | 0.244675  |
| H    | 2.715140  | 1.920713  | -0.281804 |
| Br   | -3.655565 | 0.181660  | -0.002866 |

Table S44. Coordinates of reactant complex (R<sub>c10</sub>). Units are in angstrom.

| Atom | X         | Y         | Z         |
|------|-----------|-----------|-----------|
| S    | -1.762919 | 0.004596  | -0.006057 |
| O    | -2.791349 | 1.056405  | -0.368336 |
| O    | -1.953122 | -1.149073 | -0.967020 |
| O    | -2.115418 | -0.505624 | 1.374949  |
| O    | 1.014734  | 1.244662  | -0.019949 |
| H    | 0.097153  | 0.820882  | -0.026365 |
| Br   | 2.139165  | -0.173297 | -0.000968 |

Table S45. Coordinates of reactant complex (TS<sub>10</sub>). Units are in angstrom.

| Atom | X        | Y         | Z         |
|------|----------|-----------|-----------|
| S    | 1.978718 | 0.024790  | -0.008049 |
| O    | 2.399176 | -1.033901 | -0.991108 |

|    |           |           |           |
|----|-----------|-----------|-----------|
| O  | 2.745377  | 1.285385  | -0.320605 |
| O  | 2.374501  | -0.430605 | 1.370218  |
| O  | -0.469252 | -0.024219 | -0.007909 |
| H  | -0.307053 | 0.909569  | -0.196009 |
| Br | -2.507167 | 0.009157  | -0.002285 |

Table S46. Coordinates of reactant complex ( $P_{c10}$ ). Units are in angstrom.

| Atom | X         | Y         | Z         |
|------|-----------|-----------|-----------|
| S    | -1.754022 | -0.059252 | -0.000000 |
| O    | -2.971243 | 0.732127  | -0.000063 |
| O    | -1.578224 | -0.846523 | -1.210208 |
| O    | -1.578296 | -0.846432 | 1.210276  |
| O    | -0.616661 | 1.038607  | -0.000005 |
| H    | 0.299226  | 0.625160  | -0.000007 |
| Br   | 2.334872  | -0.008553 | 0.000000  |

Table S47. Coordinates of product complex ( $R_{c11}$ ). Units are in angstrom.

| Atom | X         | Y         | Z         |
|------|-----------|-----------|-----------|
| S    | -2.634408 | -0.347818 | 0.028644  |
| O    | -2.403512 | 1.183851  | 0.017230  |
| O    | -3.512993 | -0.615614 | -1.180143 |
| O    | -3.495360 | -0.599065 | 1.253707  |
| O    | 1.308934  | -0.597938 | -0.311710 |
| H    | 0.831738  | 0.285631  | -0.235772 |
| Br   | 3.030841  | -0.192045 | 0.063369  |
| O    | 0.081799  | 1.674644  | -0.155736 |
| H    | -0.918114 | 1.475923  | -0.066061 |
| H    | 0.326529  | 2.158114  | 0.638836  |

Table S48. Coordinates of product complex ( $TS_{11}$ ). Units are in angstrom.

| Atom | X         | Y         | Z         |
|------|-----------|-----------|-----------|
| S    | -1.932451 | -0.343078 | 0.006494  |
| O    | -2.497382 | 1.063223  | -0.129999 |
| O    | -2.429340 | -1.148983 | -1.156352 |
| O    | -2.481078 | -0.935078 | 1.270459  |
| O    | 0.480756  | -0.347346 | 0.012370  |
| H    | 0.346078  | 0.619160  | -0.026424 |
| Br   | 2.542389  | -0.249425 | 0.001074  |
| O    | -0.224743 | 2.462798  | -0.099816 |
| H    | -1.124119 | 2.055332  | -0.080650 |
| H    | -0.072078 | 2.787701  | 0.792293  |

Table S49. Coordinates of product complex ( $P_{c11}$ ). Units are in angstrom.

| Atom | X         | Y         | Z         |
|------|-----------|-----------|-----------|
| S    | 1.818543  | -0.144016 | 0.025328  |
| O    | 1.598060  | 0.941193  | -0.925433 |
| O    | 1.566247  | 0.266097  | 1.394594  |
| O    | 3.085081  | -0.819185 | -0.165699 |
| O    | 0.758178  | -1.266085 | -0.318662 |
| H    | -0.175847 | -0.933869 | -0.194309 |
| Br   | -2.259173 | -0.384878 | 0.002879  |
| O    | -0.614029 | 2.490254  | 0.005977  |
| H    | 0.214372  | 2.086389  | -0.296635 |
| H    | -1.212452 | 1.724289  | 0.058735  |

### 4.3 Cartesian coordinates of the structures involving in the reaction of OBr<sup>-</sup> with SO<sub>3</sub><sup>2-</sup>.

Table S50. Coordinates of OBr<sup>-</sup>. Units are in angstrom.

| atom | X        | Y        | Z         |
|------|----------|----------|-----------|
| O    | 0.000000 | 0.000000 | -1.461728 |
| Br   | 0.000000 | 0.000000 | 0.334109  |

Table S51. Coordinates of reactant complex (R<sub>c12</sub>). Units are in angstrom.

| Atom | X         | Y         | Z         |
|------|-----------|-----------|-----------|
| S    | 2.853608  | -0.024325 | -0.027034 |
| O    | 3.340422  | -0.209897 | 1.409439  |
| O    | 3.741249  | -0.926377 | -0.883550 |
| O    | 3.238968  | 1.405373  | -0.407701 |
| O    | -4.355405 | 0.494444  | 0.058548  |
| Br   | -2.667988 | -0.163404 | -0.028039 |

Table S52. Coordinates of transition state (TS<sub>12</sub>). Units are in angstrom.

| Atom | X         | Y         | Z         |
|------|-----------|-----------|-----------|
| S    | -1.297174 | -0.022195 | -0.000003 |
| O    | -1.686205 | -0.759764 | 1.214203  |
| O    | -1.860775 | 1.338720  | -0.000603 |
| O    | -1.686046 | -0.760764 | -1.213654 |
| O    | 3.429158  | -0.147585 | -0.000029 |
| Br   | 1.005306  | 0.085436  | 0.000020  |

Table S53. Coordinates of reactant complex (R<sub>c13</sub>). Units are in angstrom.

| Atom | X        | Y        | Z         |
|------|----------|----------|-----------|
|      | 2.225526 | 0.168093 | -0.001913 |

|           |           |           |
|-----------|-----------|-----------|
| 2.766911  | 1.553194  | -0.361704 |
| 2.838207  | -0.163935 | 1.360741  |
| 2.883470  | -0.795551 | -0.991087 |
| -2.941489 | -0.811399 | 0.002889  |
| -4.032427 | 1.431459  | -0.001775 |
| -3.549279 | 0.500573  | 0.000055  |
| -3.324858 | 2.080082  | -0.000989 |
| -1.167190 | -0.428008 | -0.001170 |

Table S54. Coordinates of transition state (TS<sub>13</sub>). Units are in angstrom.

| Atom | X         | Y         | Z         |
|------|-----------|-----------|-----------|
| S    | 2.200092  | 0.160574  | 0.000273  |
| O    | 2.638973  | 1.558353  | -0.384433 |
| O    | 2.758057  | -0.146772 | 1.374266  |
| O    | 2.812254  | -0.812874 | -0.985825 |
| O    | -2.802225 | -0.849052 | -0.001615 |
| O    | -4.593387 | 1.073930  | 0.008946  |
| H    | -3.425683 | -0.027806 | 0.005266  |
| H    | -4.026542 | 1.846462  | -0.057585 |
| Br   | -0.978818 | -0.313614 | -0.001222 |

Table S55. Coordinates of product complex (P<sub>c13</sub>). Units are in angstrom.

| Atom | X         | Y         | Z         |
|------|-----------|-----------|-----------|
| S    | 1.680182  | 0.294937  | 0.002518  |
| O    | 1.247056  | 1.664175  | -0.109322 |
| O    | 2.262447  | -0.060844 | 1.271474  |
| O    | 2.366513  | -0.226120 | -1.152215 |
| O    | -4.702118 | -0.480589 | 0.008649  |
| O    | -2.525596 | 2.110024  | -0.006312 |
| H    | -4.011289 | 0.188924  | 0.006819  |
| H    | -1.921365 | 1.363421  | -0.004143 |
| Br   | -0.289619 | -0.866415 | -0.004033 |

Table S56. Coordinates of reactant complex (R<sub>c14</sub>). Units are in angstrom.

| Atom | X         | Y         | Z         |
|------|-----------|-----------|-----------|
| S    | -2.700801 | -0.009142 | -0.007471 |
| O    | -3.426318 | -1.004225 | -0.911704 |
| O    | -3.267196 | -0.247406 | 1.391073  |
| O    | -3.209200 | 1.369546  | -0.428942 |
| O    | 1.386490  | -0.230448 | -0.065239 |
| Br   | 3.181217  | 0.029901  | 0.006801  |

Table S57. Coordinates of transition state (TS<sub>14</sub>). Units are in angstrom.

| Atom | X         | Y         | Z         |
|------|-----------|-----------|-----------|
| S    | -1.965569 | -0.001749 | 0.004910  |
| O    | -2.581893 | -0.972745 | 1.001481  |
| O    | -2.540862 | 1.368806  | 0.331517  |
| O    | -2.518632 | -0.382531 | -1.360782 |
| O    | 0.401586  | -0.010089 | 0.011996  |
| Br   | 2.553358  | 0.000013  | 0.001364  |

Table S58. Coordinates of product complex ( $P_{c14}$ ). Units are in angstrom.

| Atom | X         | Y         | Z         |
|------|-----------|-----------|-----------|
| S    | -2.737586 | -0.000020 | -0.000480 |
| O    | -3.236137 | -0.991822 | -0.982126 |
| O    | -3.269488 | -0.328038 | 1.344195  |
| O    | -3.189840 | 1.356420  | -0.392233 |
| O    | -1.255369 | -0.036244 | 0.030762  |
| Br   | 3.754516  | -0.000063 | 0.000083  |

Table S59. Coordinates of reactant complex ( $R_{c15}$ ). Units are in angstrom.

| atom | X         | Y         | Z         |
|------|-----------|-----------|-----------|
| S    | -2.670341 | -0.299962 | 0.054776  |
| O    | -3.459629 | -0.995073 | -1.048382 |
| O    | -3.581805 | -0.288517 | 1.277370  |
| O    | -2.561983 | 1.167557  | -0.385797 |
| O    | 1.318766  | -0.535554 | 0.086303  |
| O    | 0.128712  | 1.765063  | -0.059203 |
| H    | 0.621165  | 0.885025  | -0.006872 |
| H    | -0.814677 | 1.531032  | -0.167580 |
| Br   | 3.090471  | -0.186413 | 0.009592  |

Table S60. Coordinates of transition state ( $TS_{15}$ ). Units are in angstrom.

| atom | X         | Y         | Z         |
|------|-----------|-----------|-----------|
| S    | -1.923184 | -0.260883 | 0.005550  |
| O    | -2.393834 | -1.179550 | -1.103496 |
| O    | -2.493103 | -0.806138 | 1.299634  |
| O    | -2.592694 | 1.088458  | -0.232432 |
| O    | 0.402517  | -0.244062 | 0.021135  |
| O    | -0.006298 | 2.291460  | 0.009184  |
| H    | 0.271889  | 1.304286  | 0.016765  |
| H    | -0.967399 | 2.188663  | -0.060632 |
| Br   | 2.518107  | -0.243433 | 0.000082  |

Table S61. Coordinates of reactant complex ( $P_{c15}$ ). Units are in angstrom.



| atom | X         | Y         | Z         |
|------|-----------|-----------|-----------|
| S    | -2.469126 | -0.171390 | -0.000000 |
| O    | -3.276439 | -0.441475 | -1.209997 |
| O    | -3.276486 | -0.441413 | 1.209979  |
| O    | -2.049808 | 1.256881  | -0.000028 |
| O    | -1.261647 | -1.027580 | 0.000046  |
| O    | 0.647233  | 1.859217  | 0.000001  |
| H    | 1.306647  | 1.141179  | 0.000006  |
| H    | -0.239866 | 1.454381  | -0.000010 |
| Br   | 3.205040  | -0.271382 | -0.000000 |

## 6 Note and References

- 1 J. Liu, A. Ning, L. Liu, H. Wang, T. Kurtén and X. Zhang, *Sci. Total Environ.*, 2021, **787**, 147551.
- 2 W. F. McCoy, E. R. B. III and R. W. Johnson, Hypohalous Acid and haloamine flashoff in industrial evaporative cooling systems, Cooling Tower Institute Annual Meeting, 1990.
